# Supplementary material
Source: PubMed Central journal article supplement (PMC3184363)

## Supporting Information

### **Three-Component, One-Flask Synthesis of Rhodanines (Thiazolidinones)**

Alexander M. Jacobine and Gary H. Posner\*

*Department of Chemistry, The Johns Hopkins University, 3400 N. Charles Street,  
Baltimore, MD 21218*

<sup>1</sup>H and <sup>13</sup>C NMR Spectra.....S2-S27

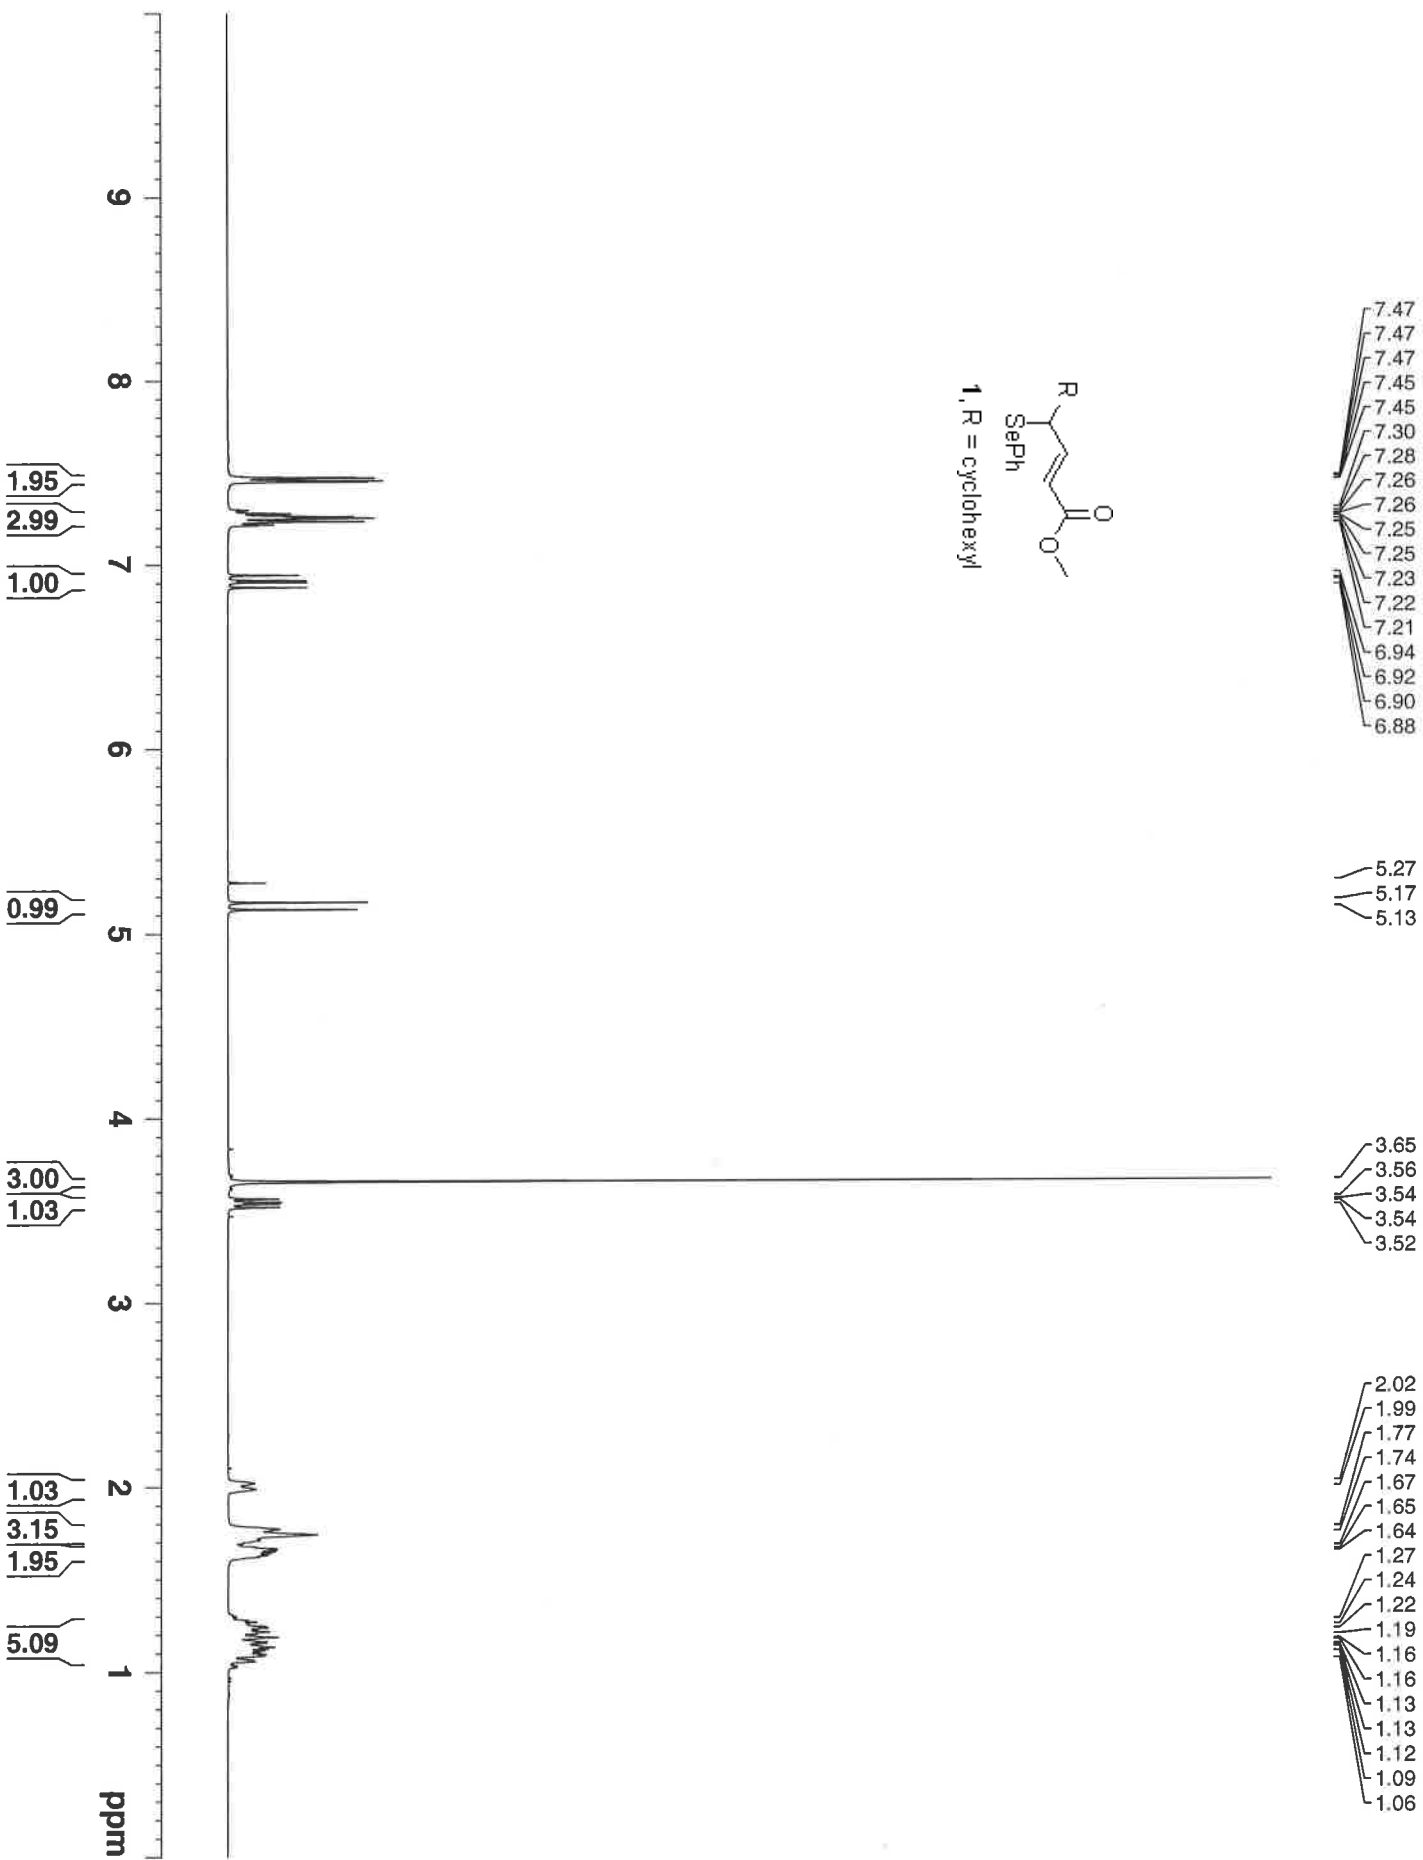

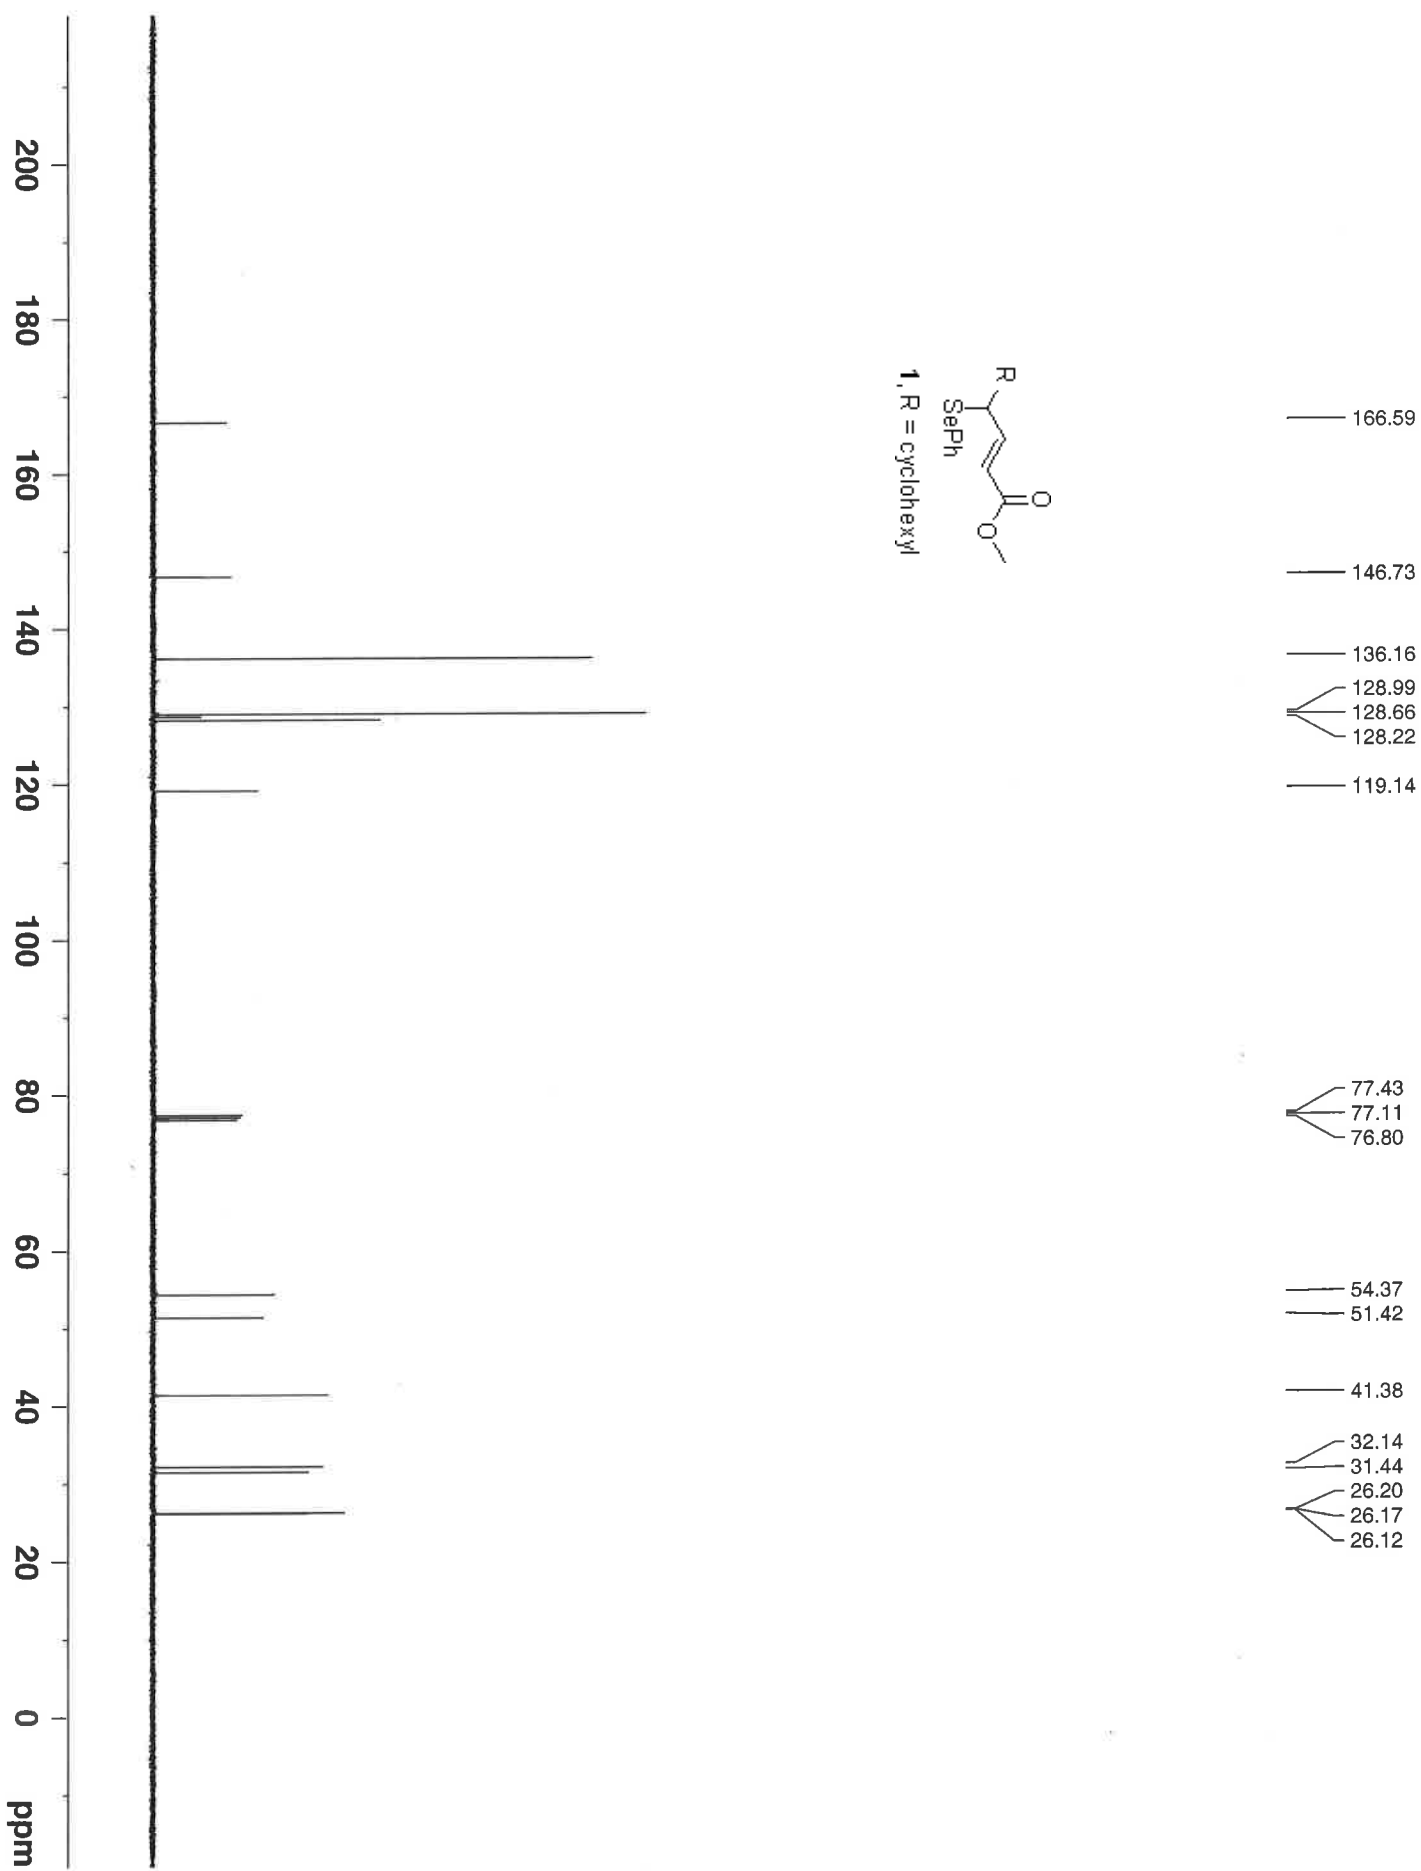

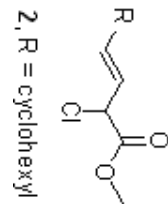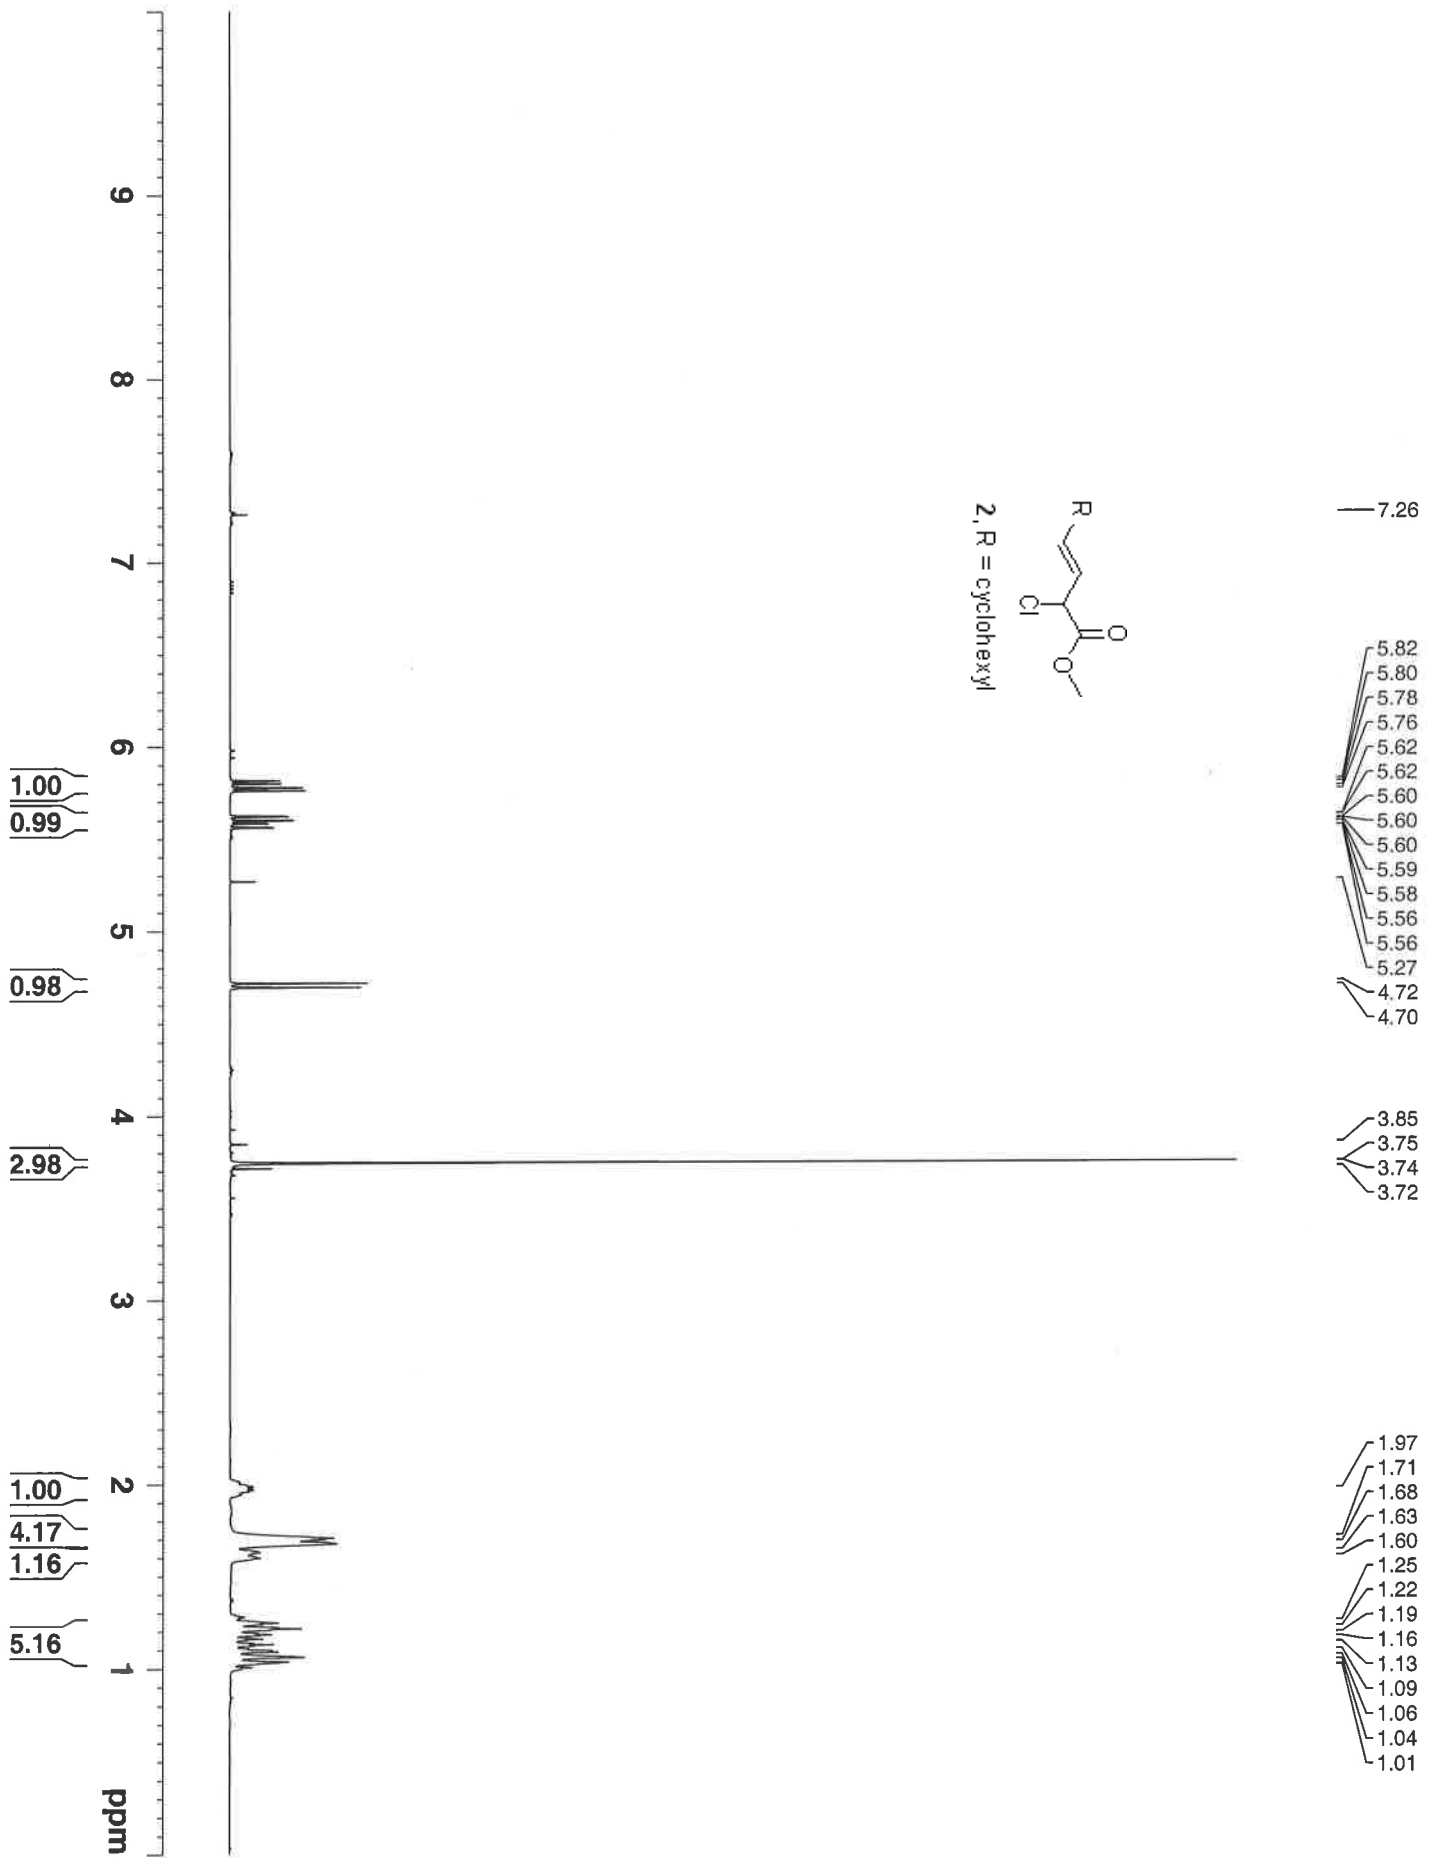

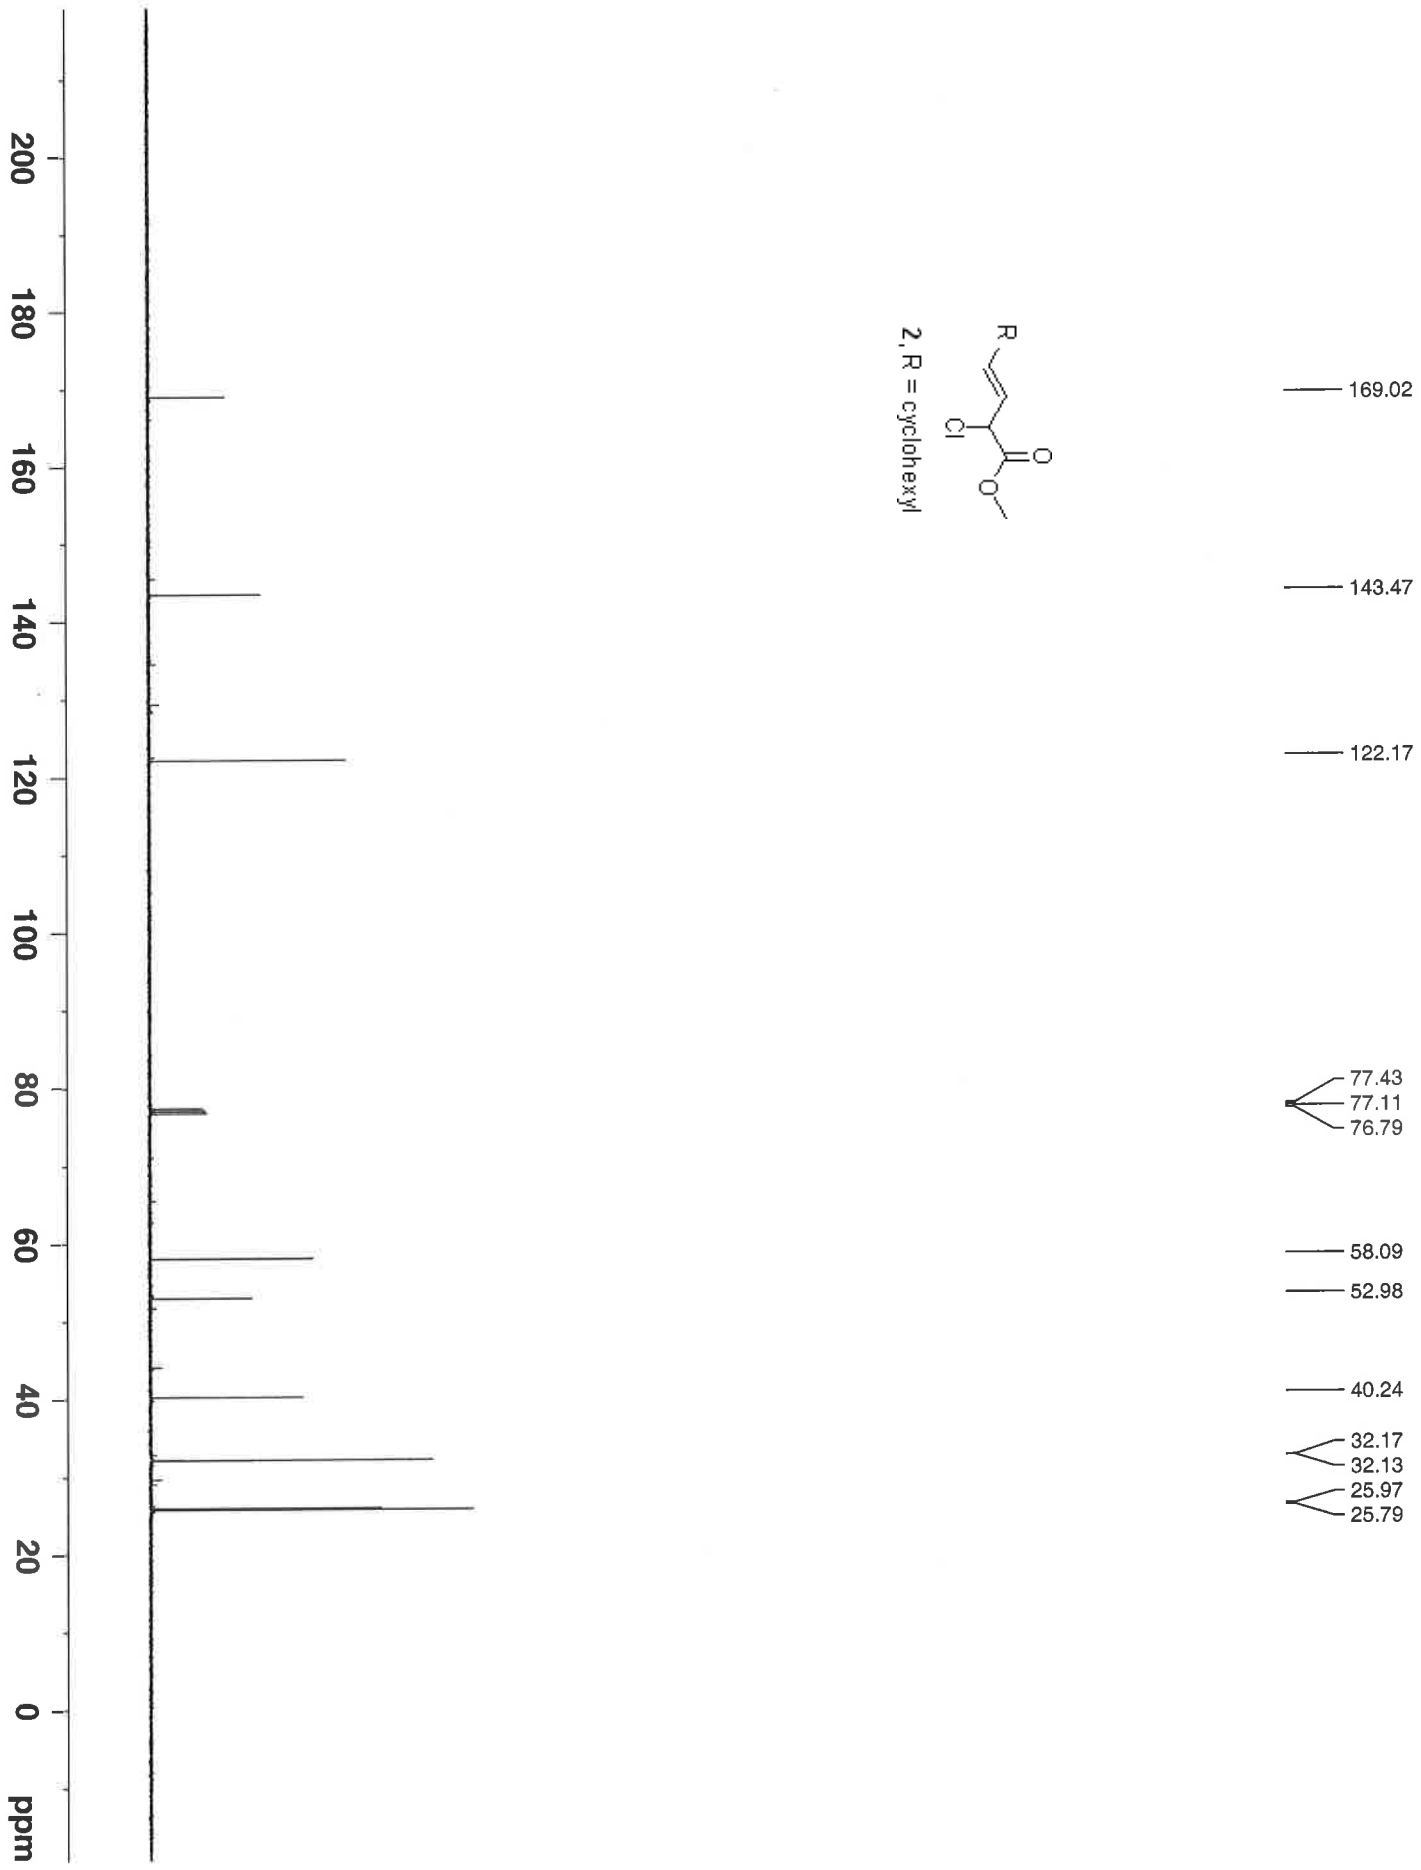

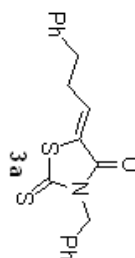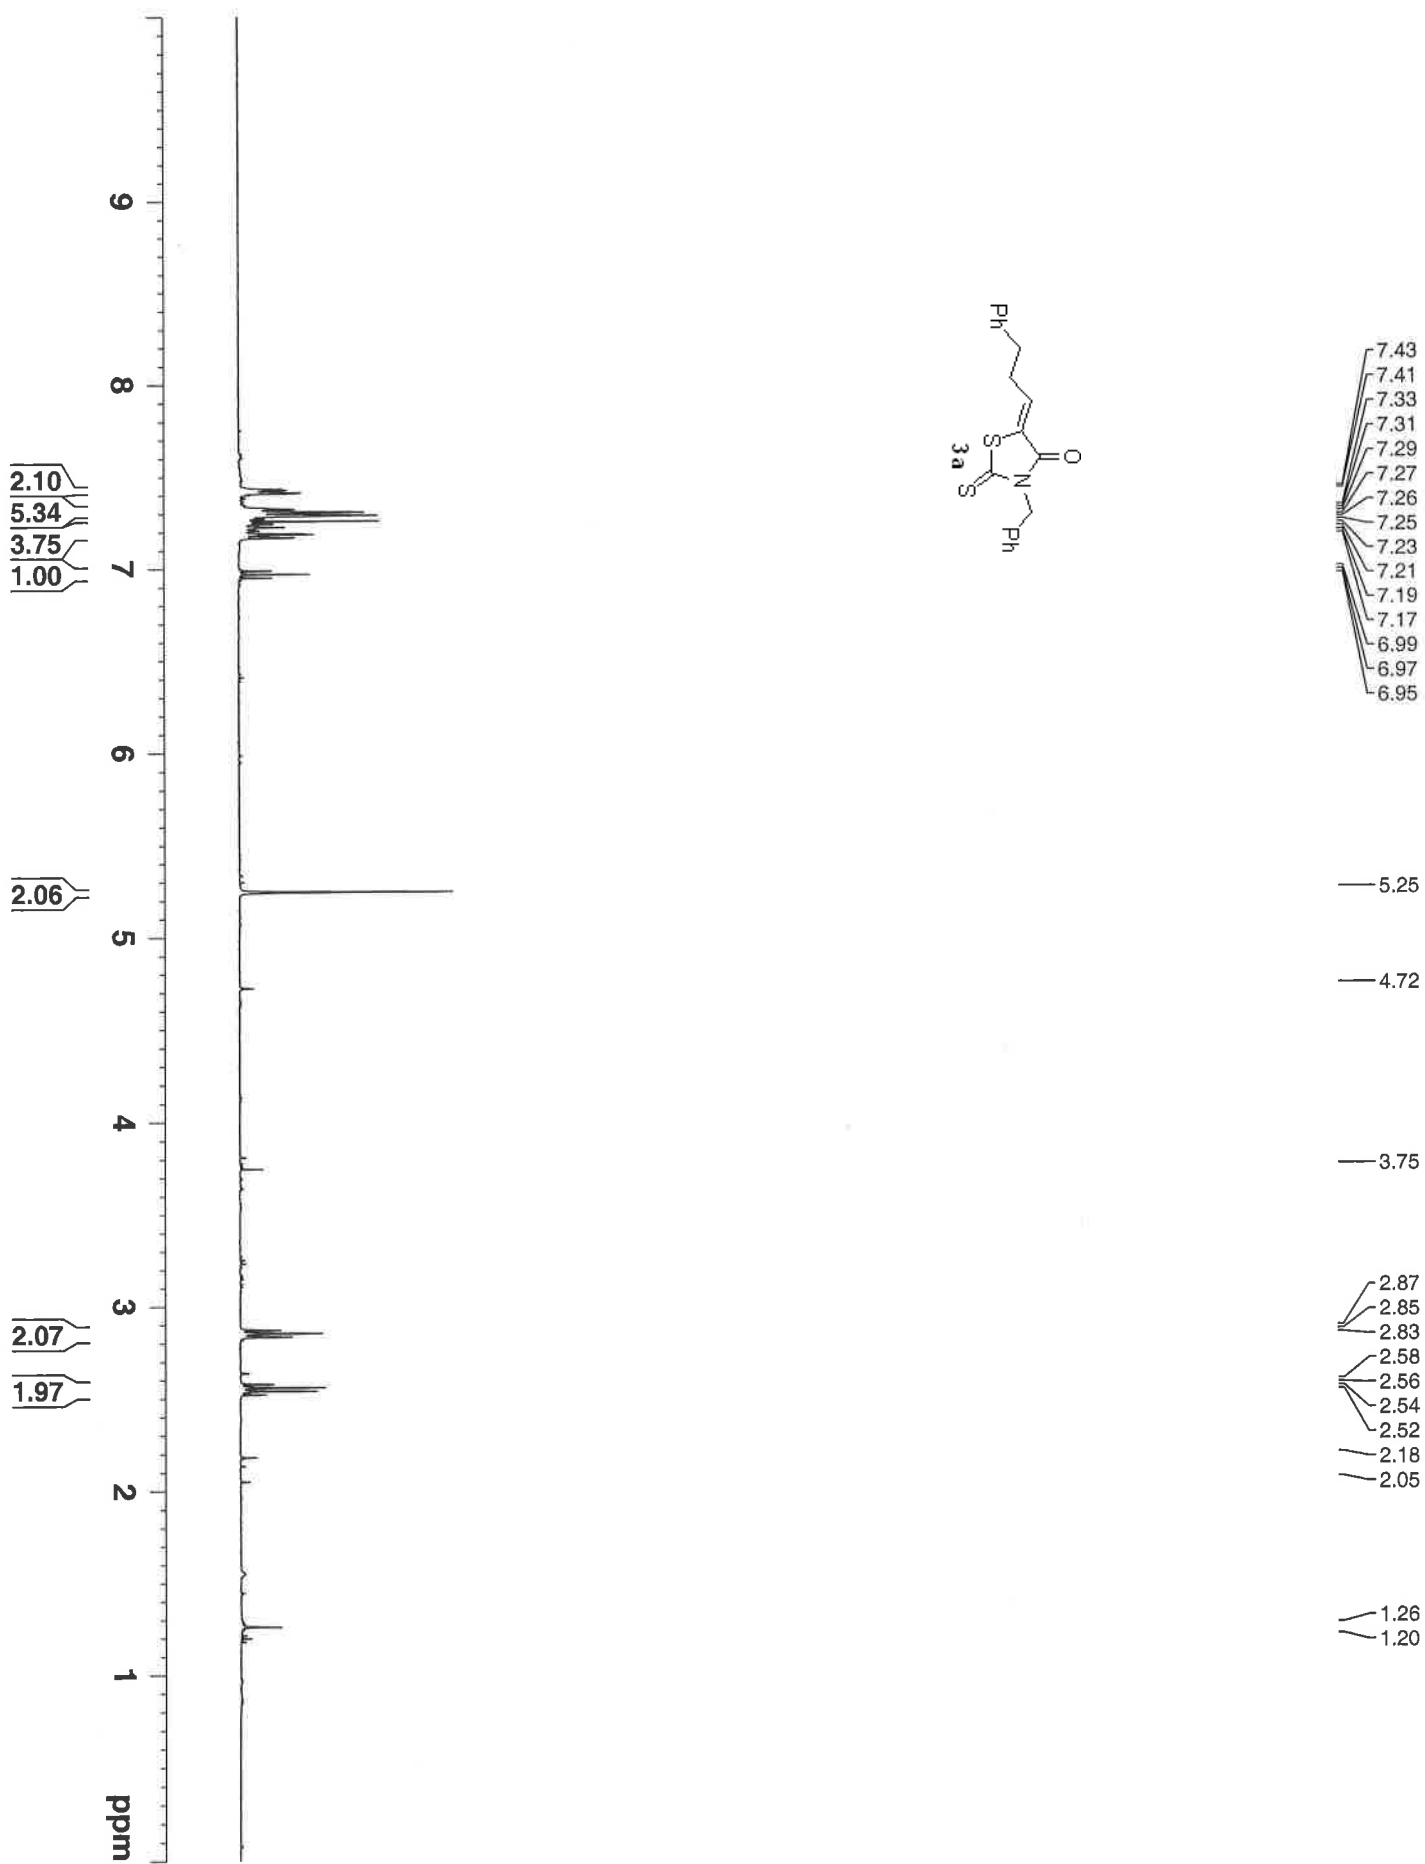

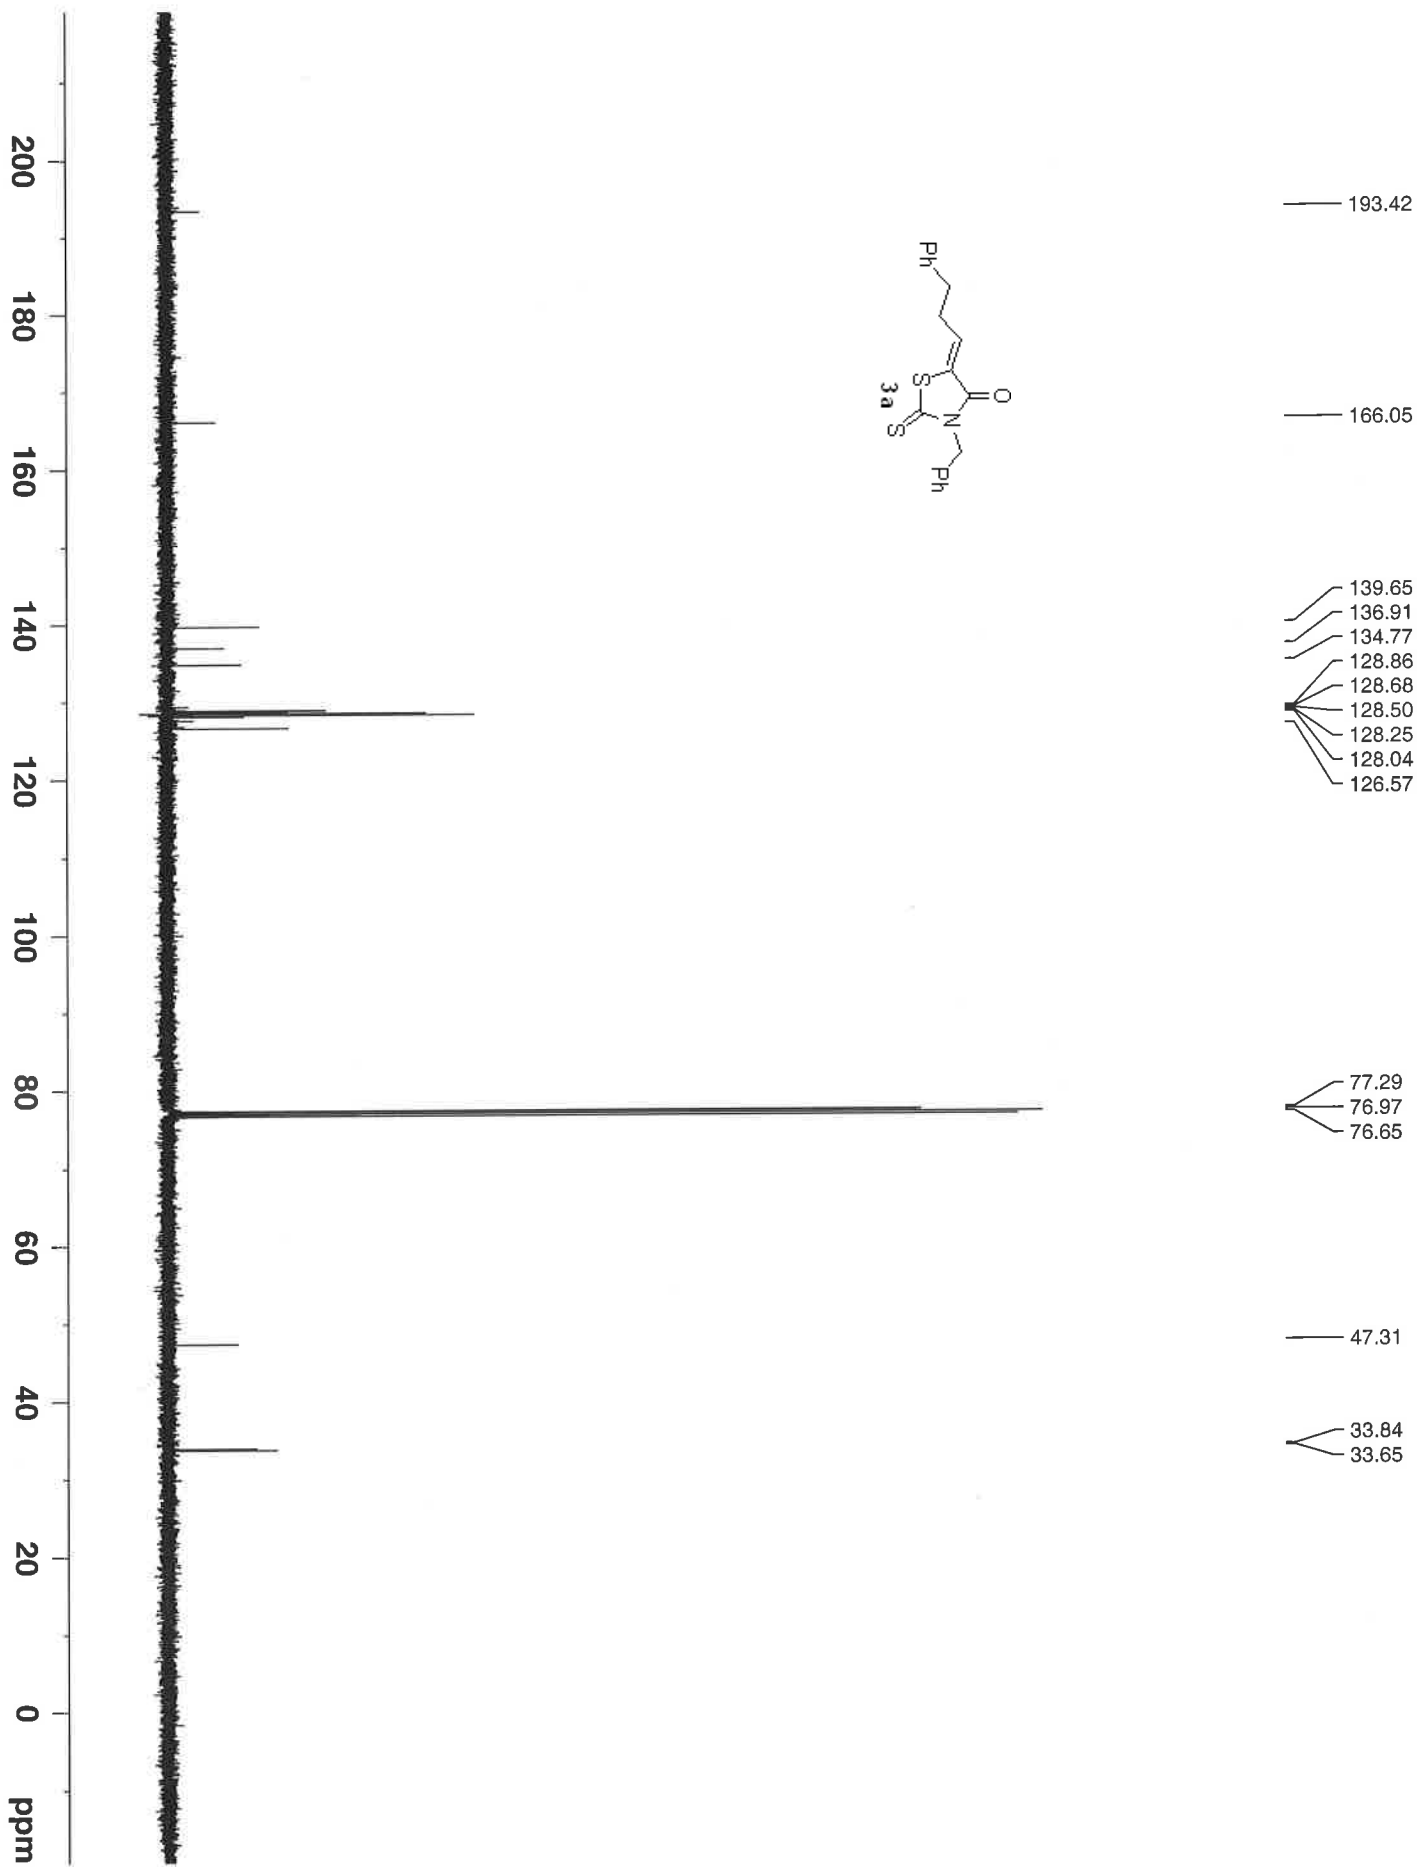

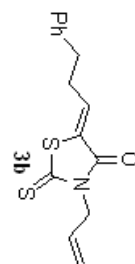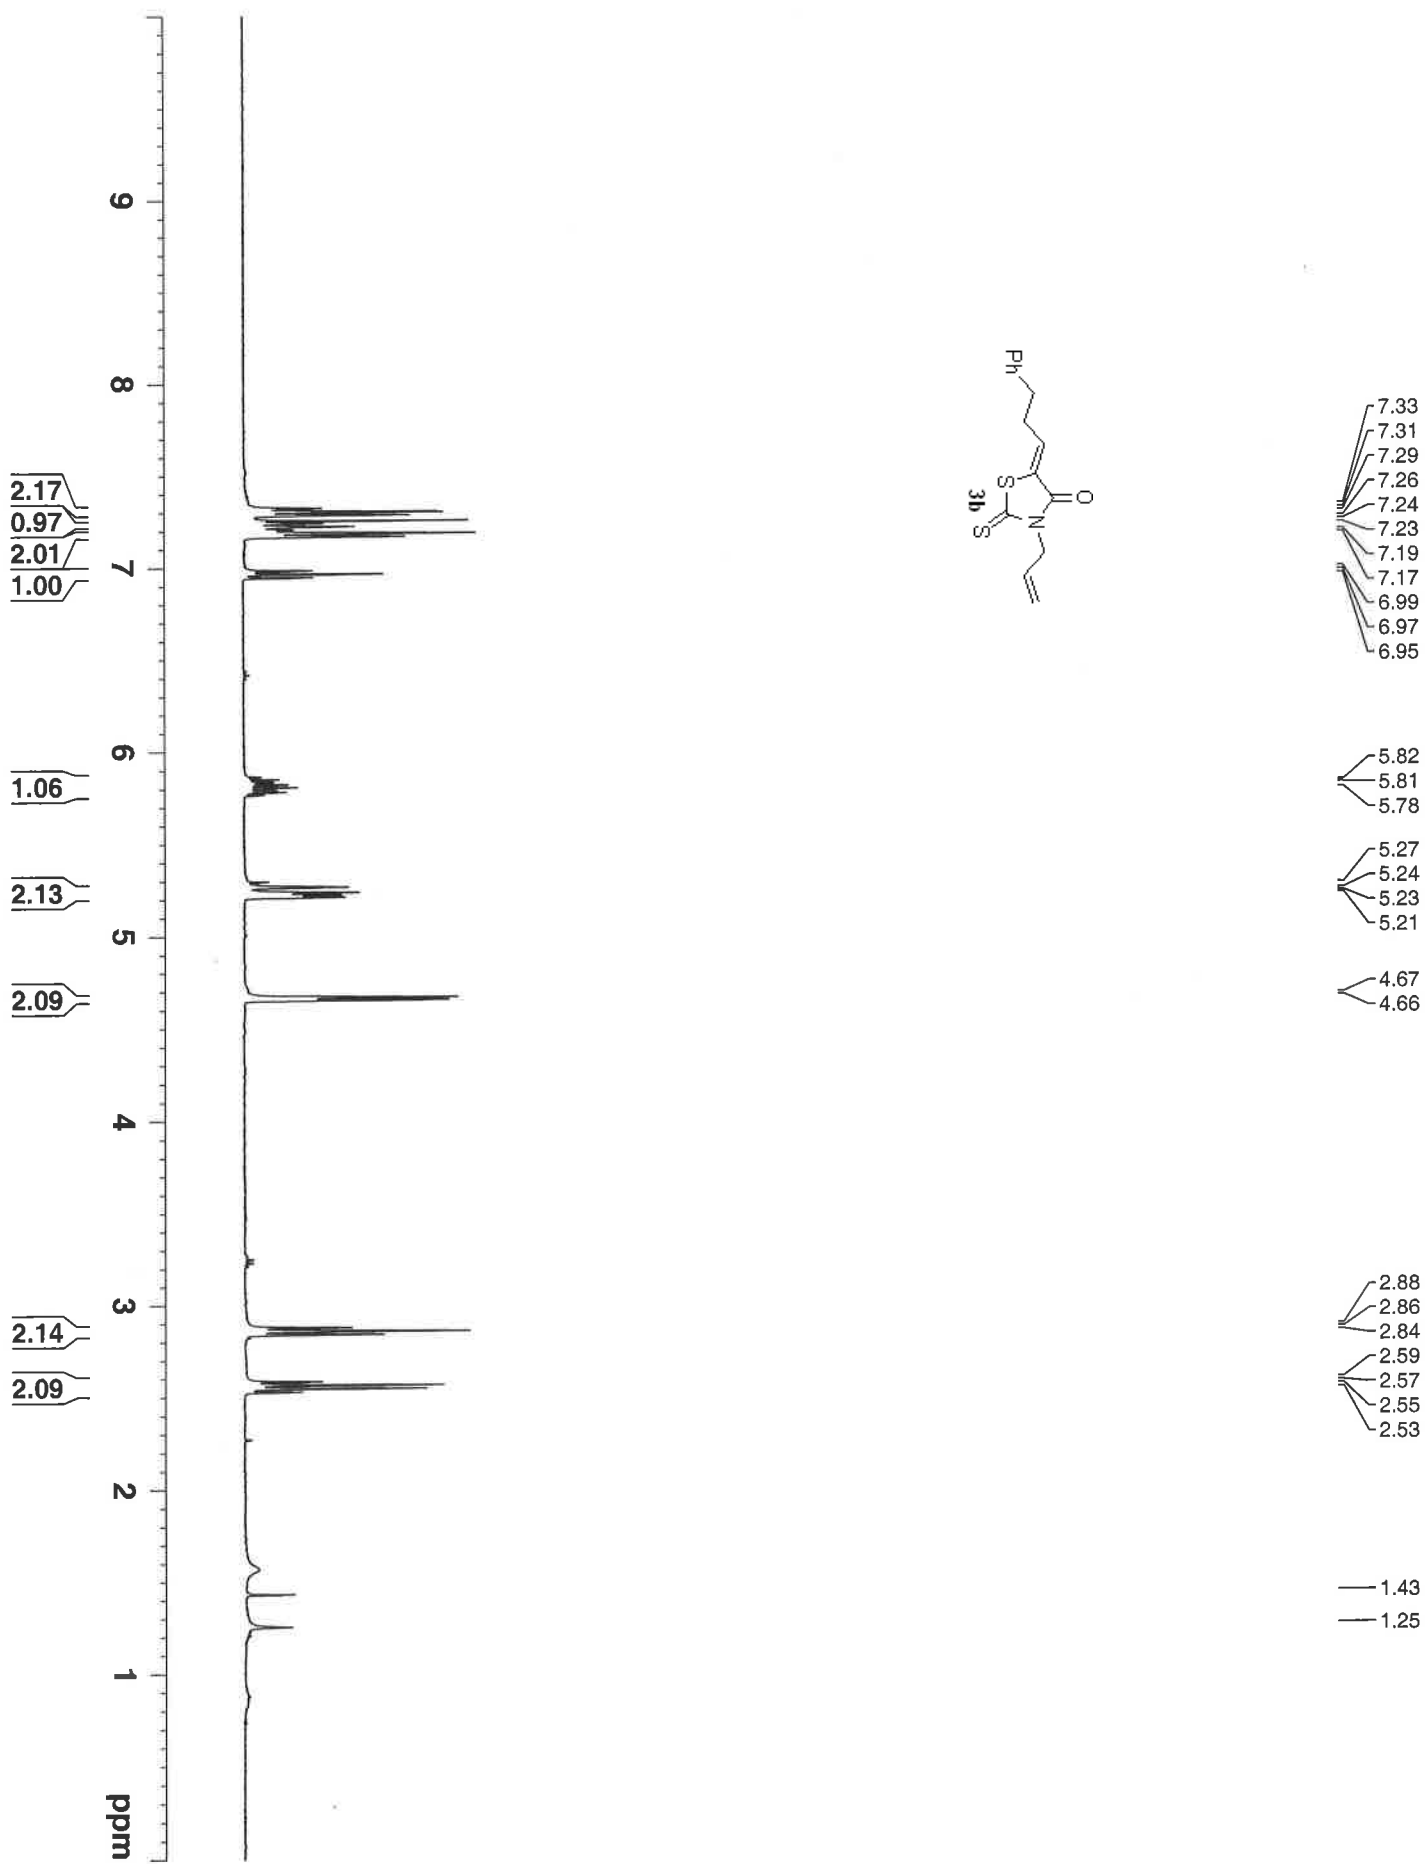



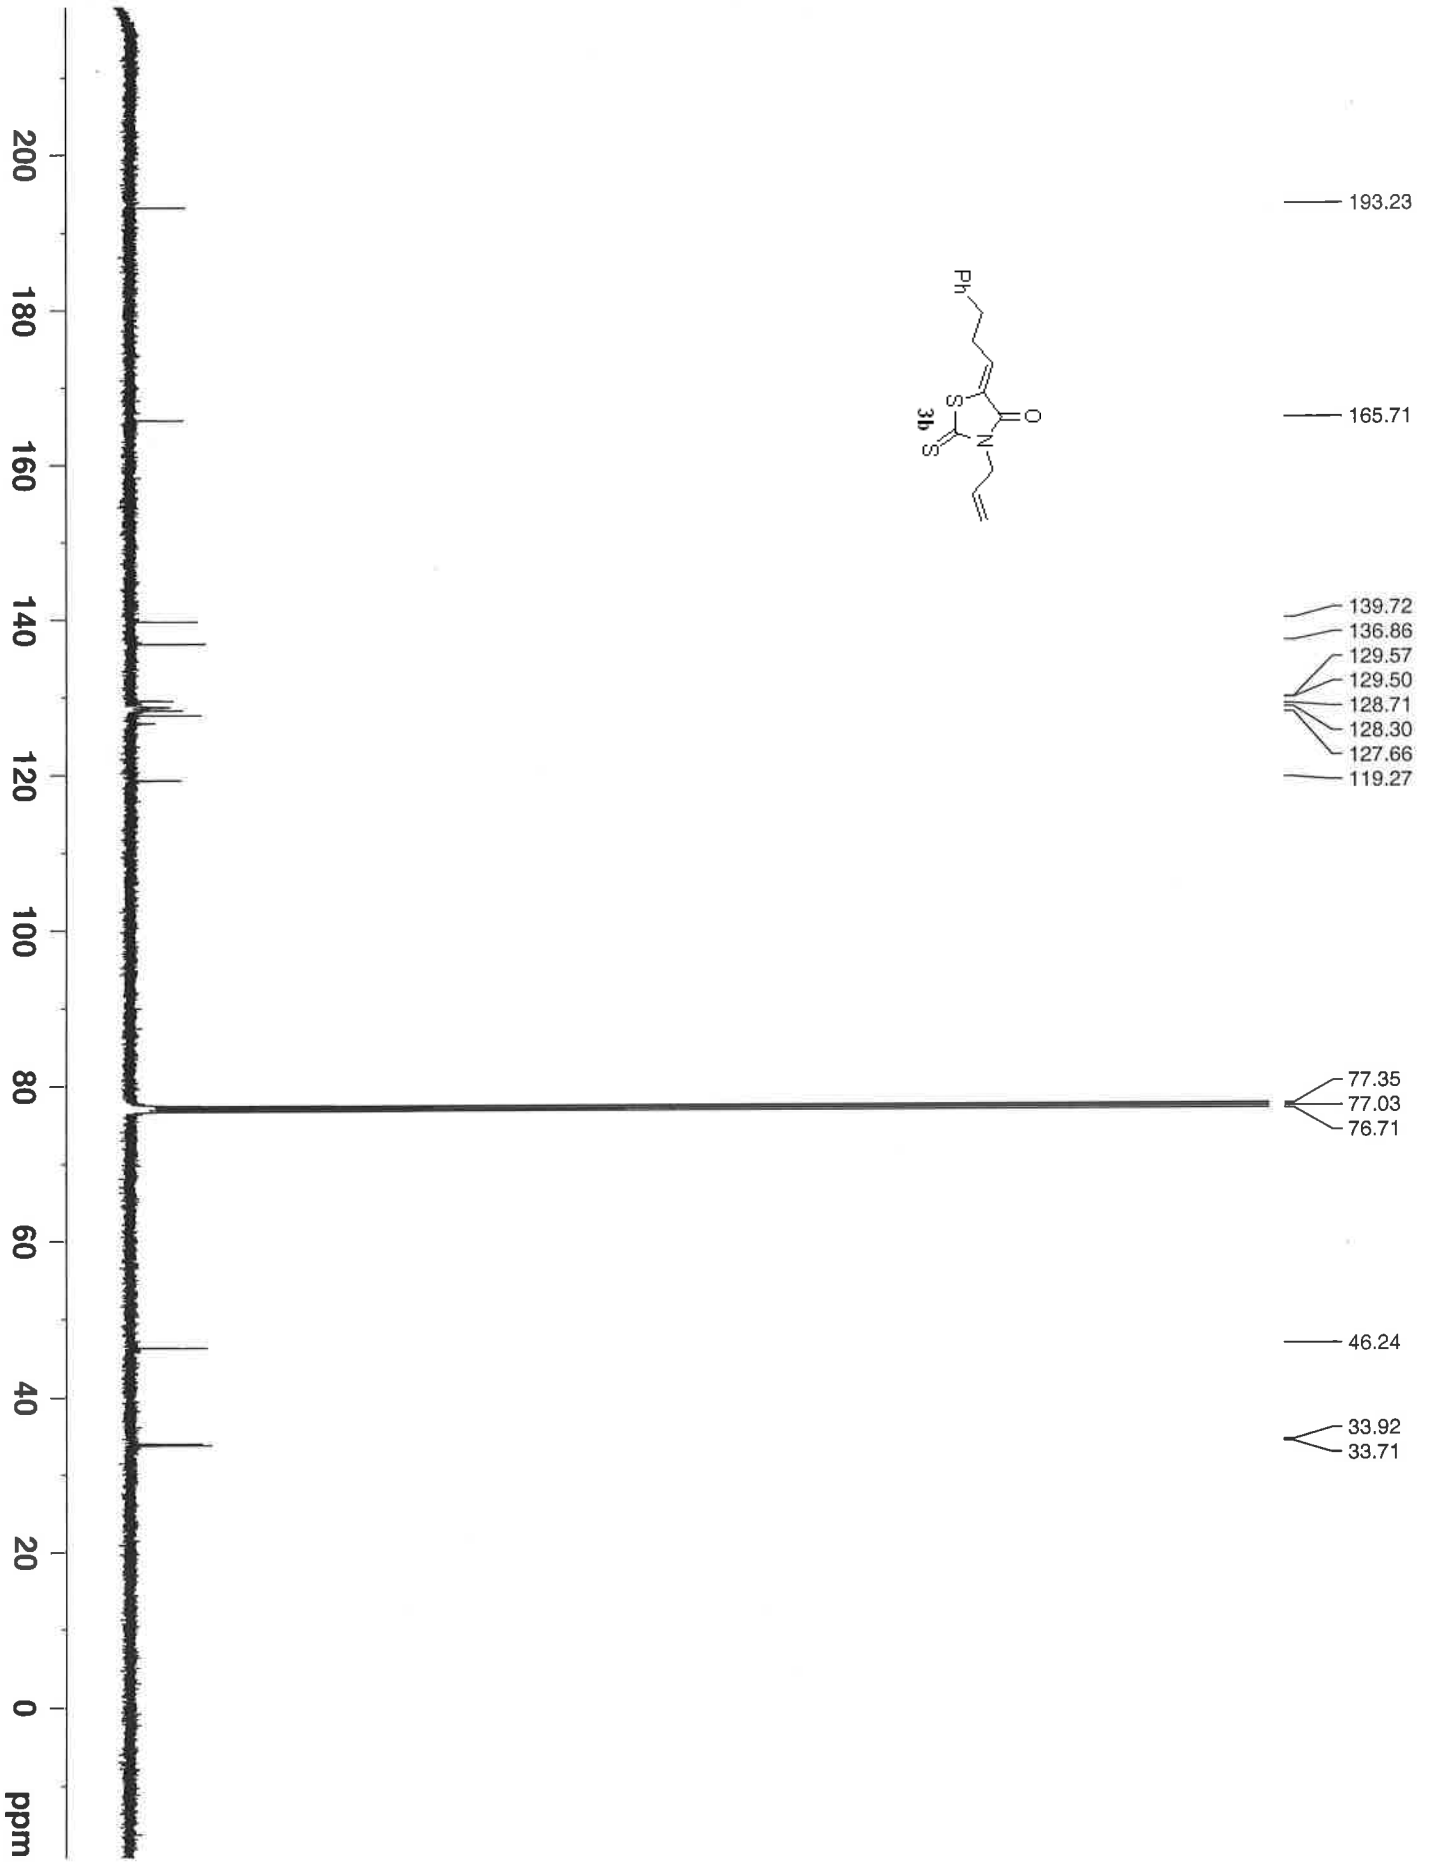

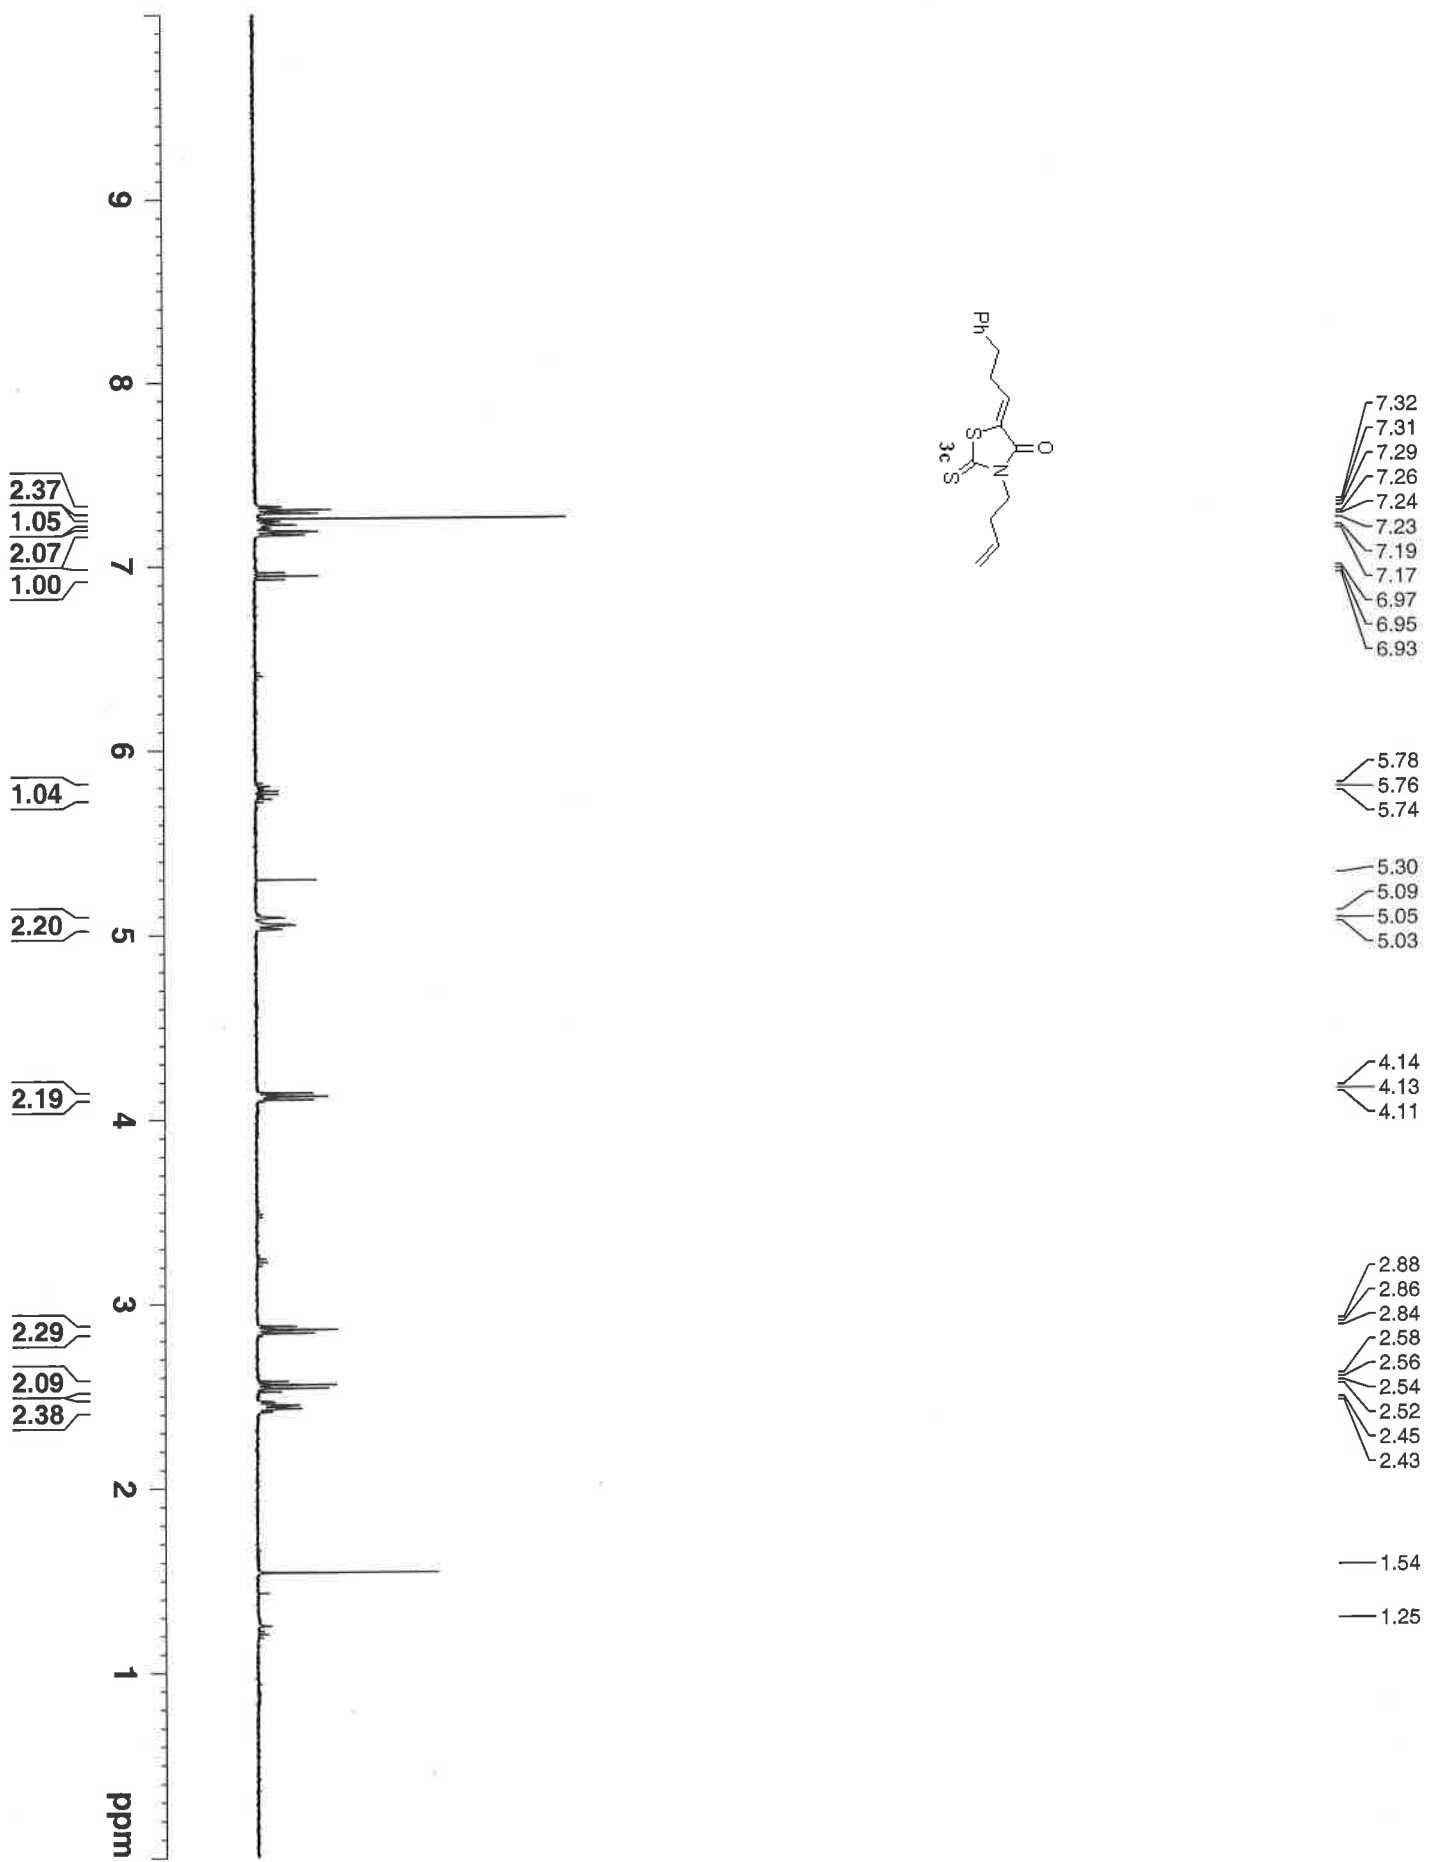

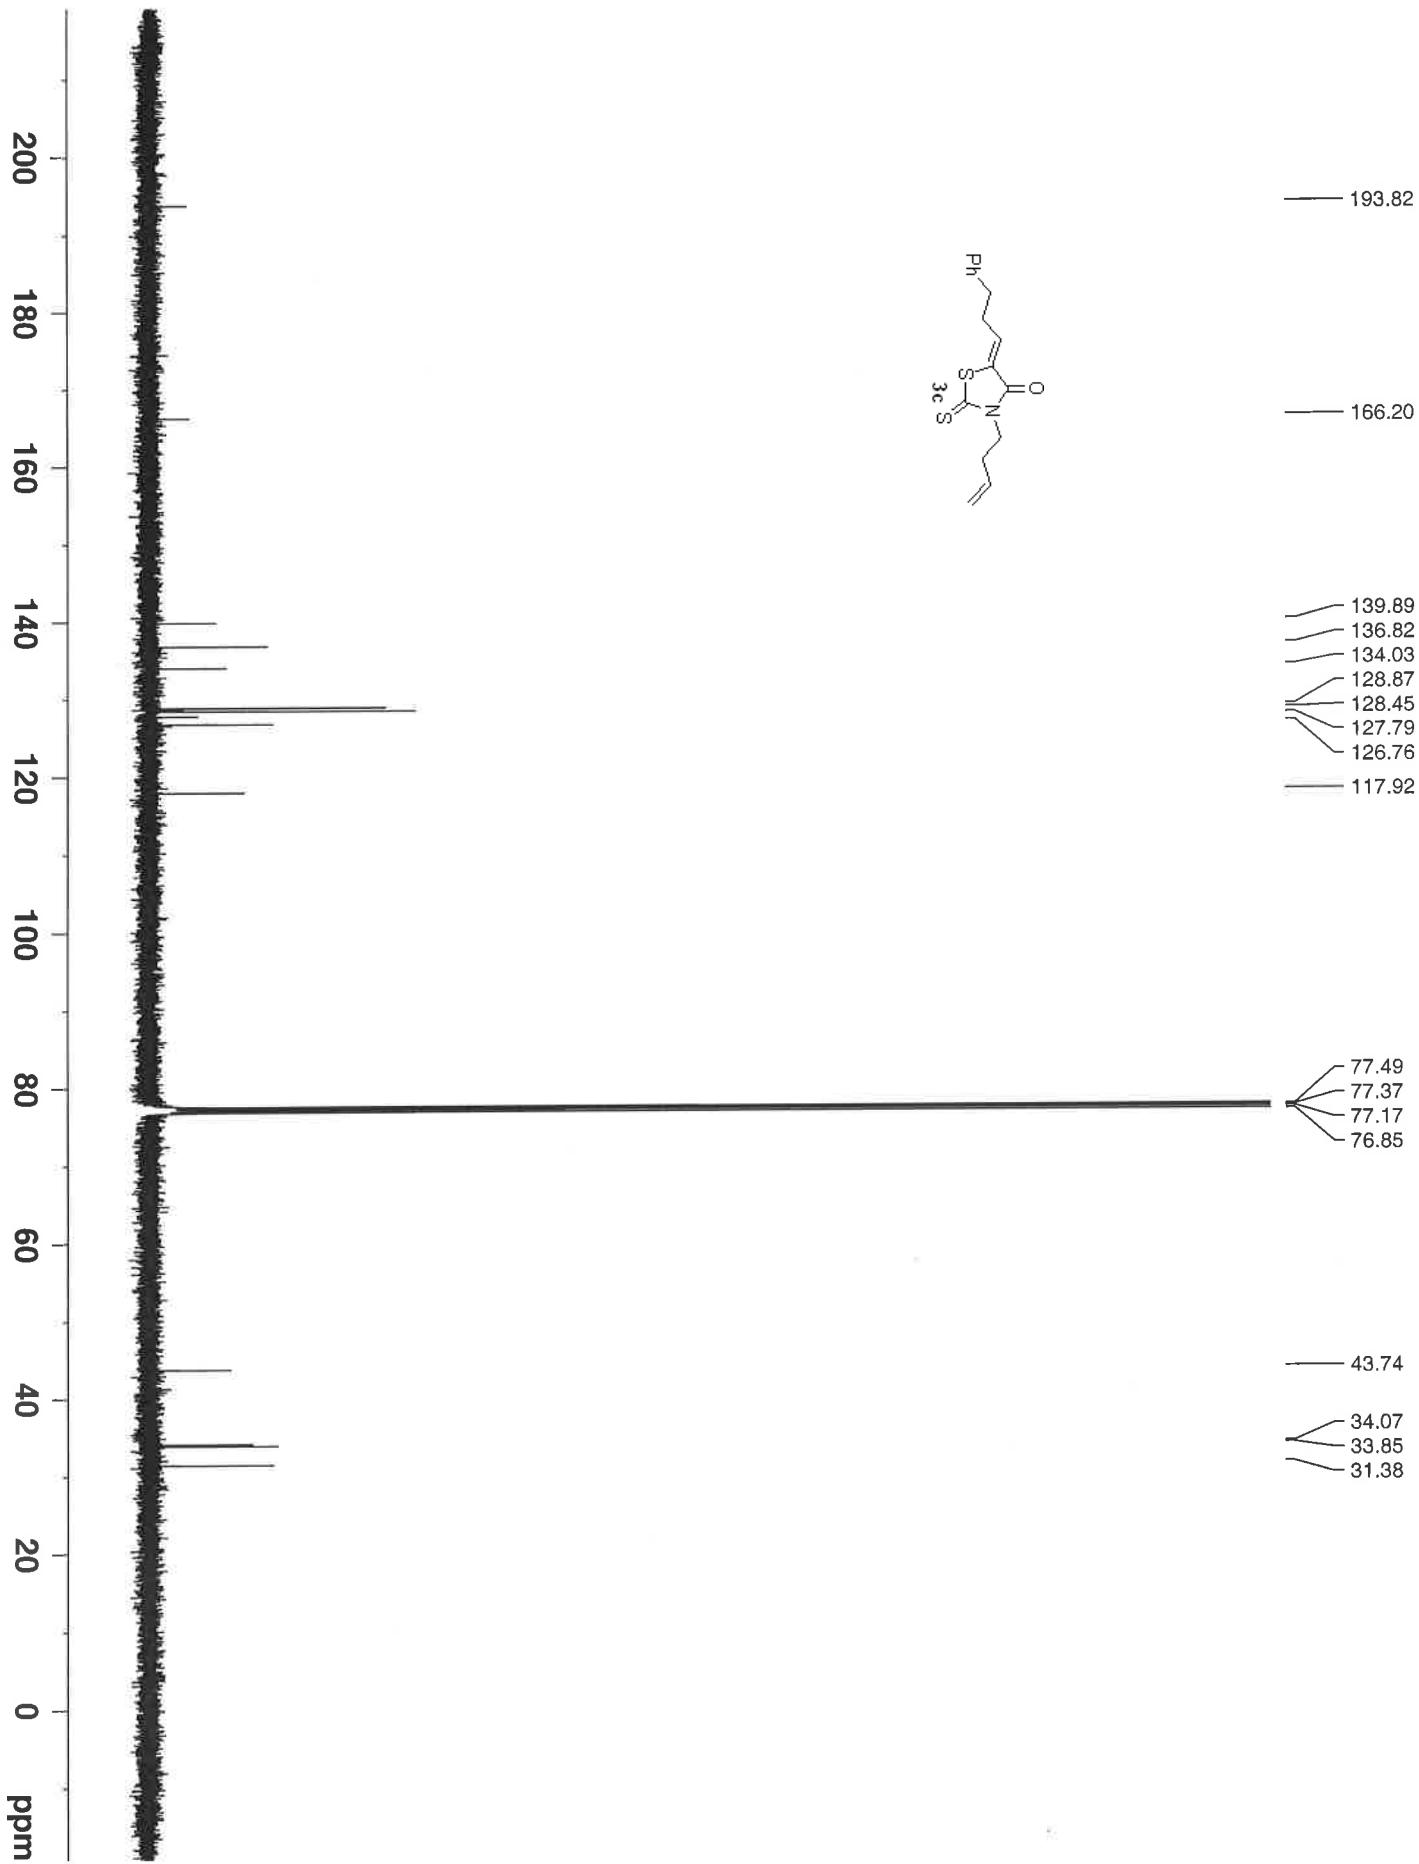

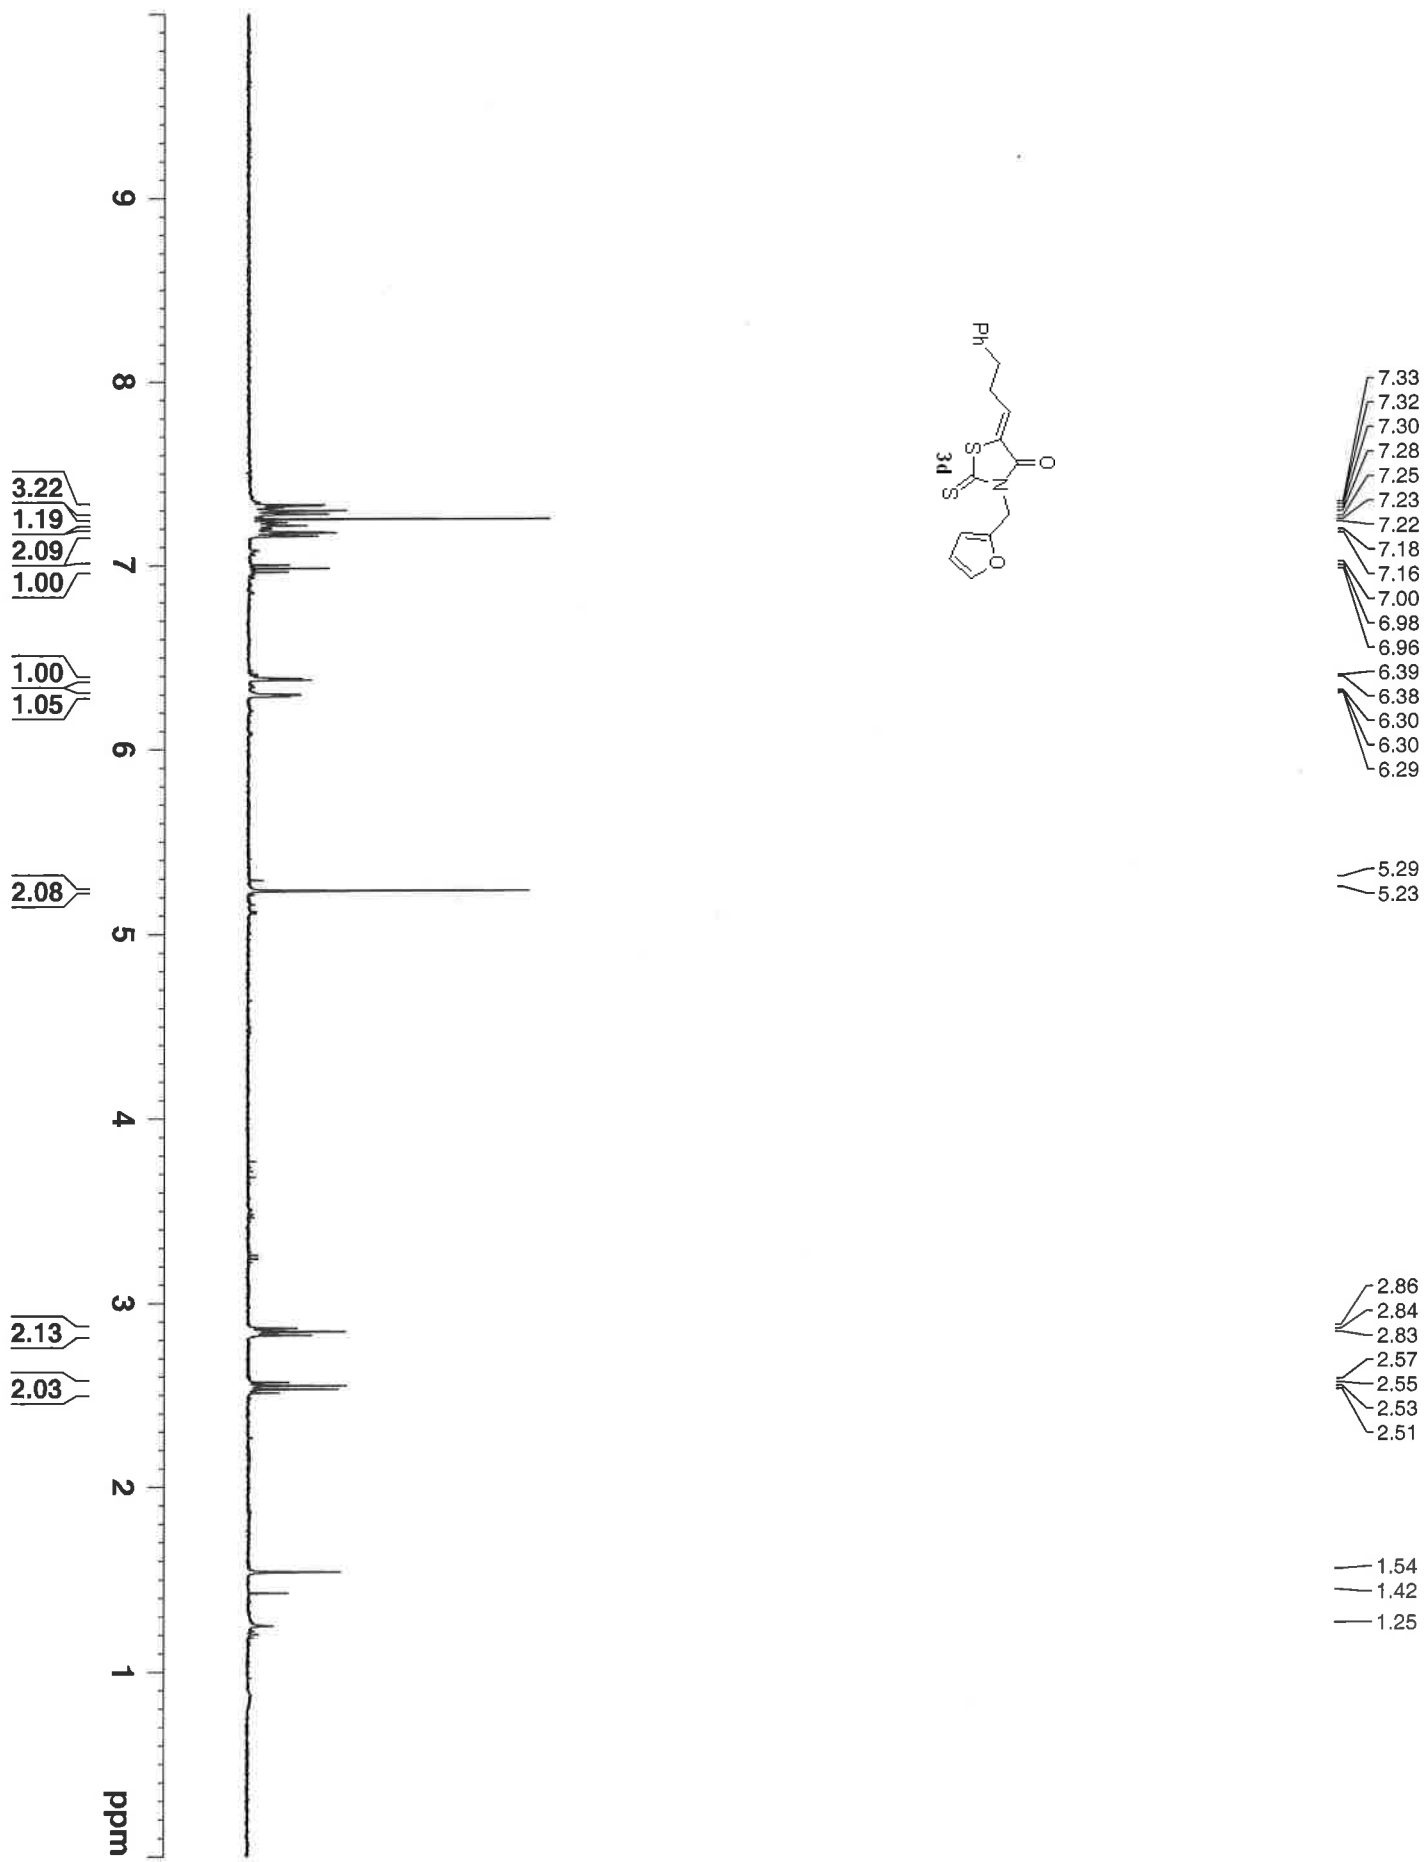

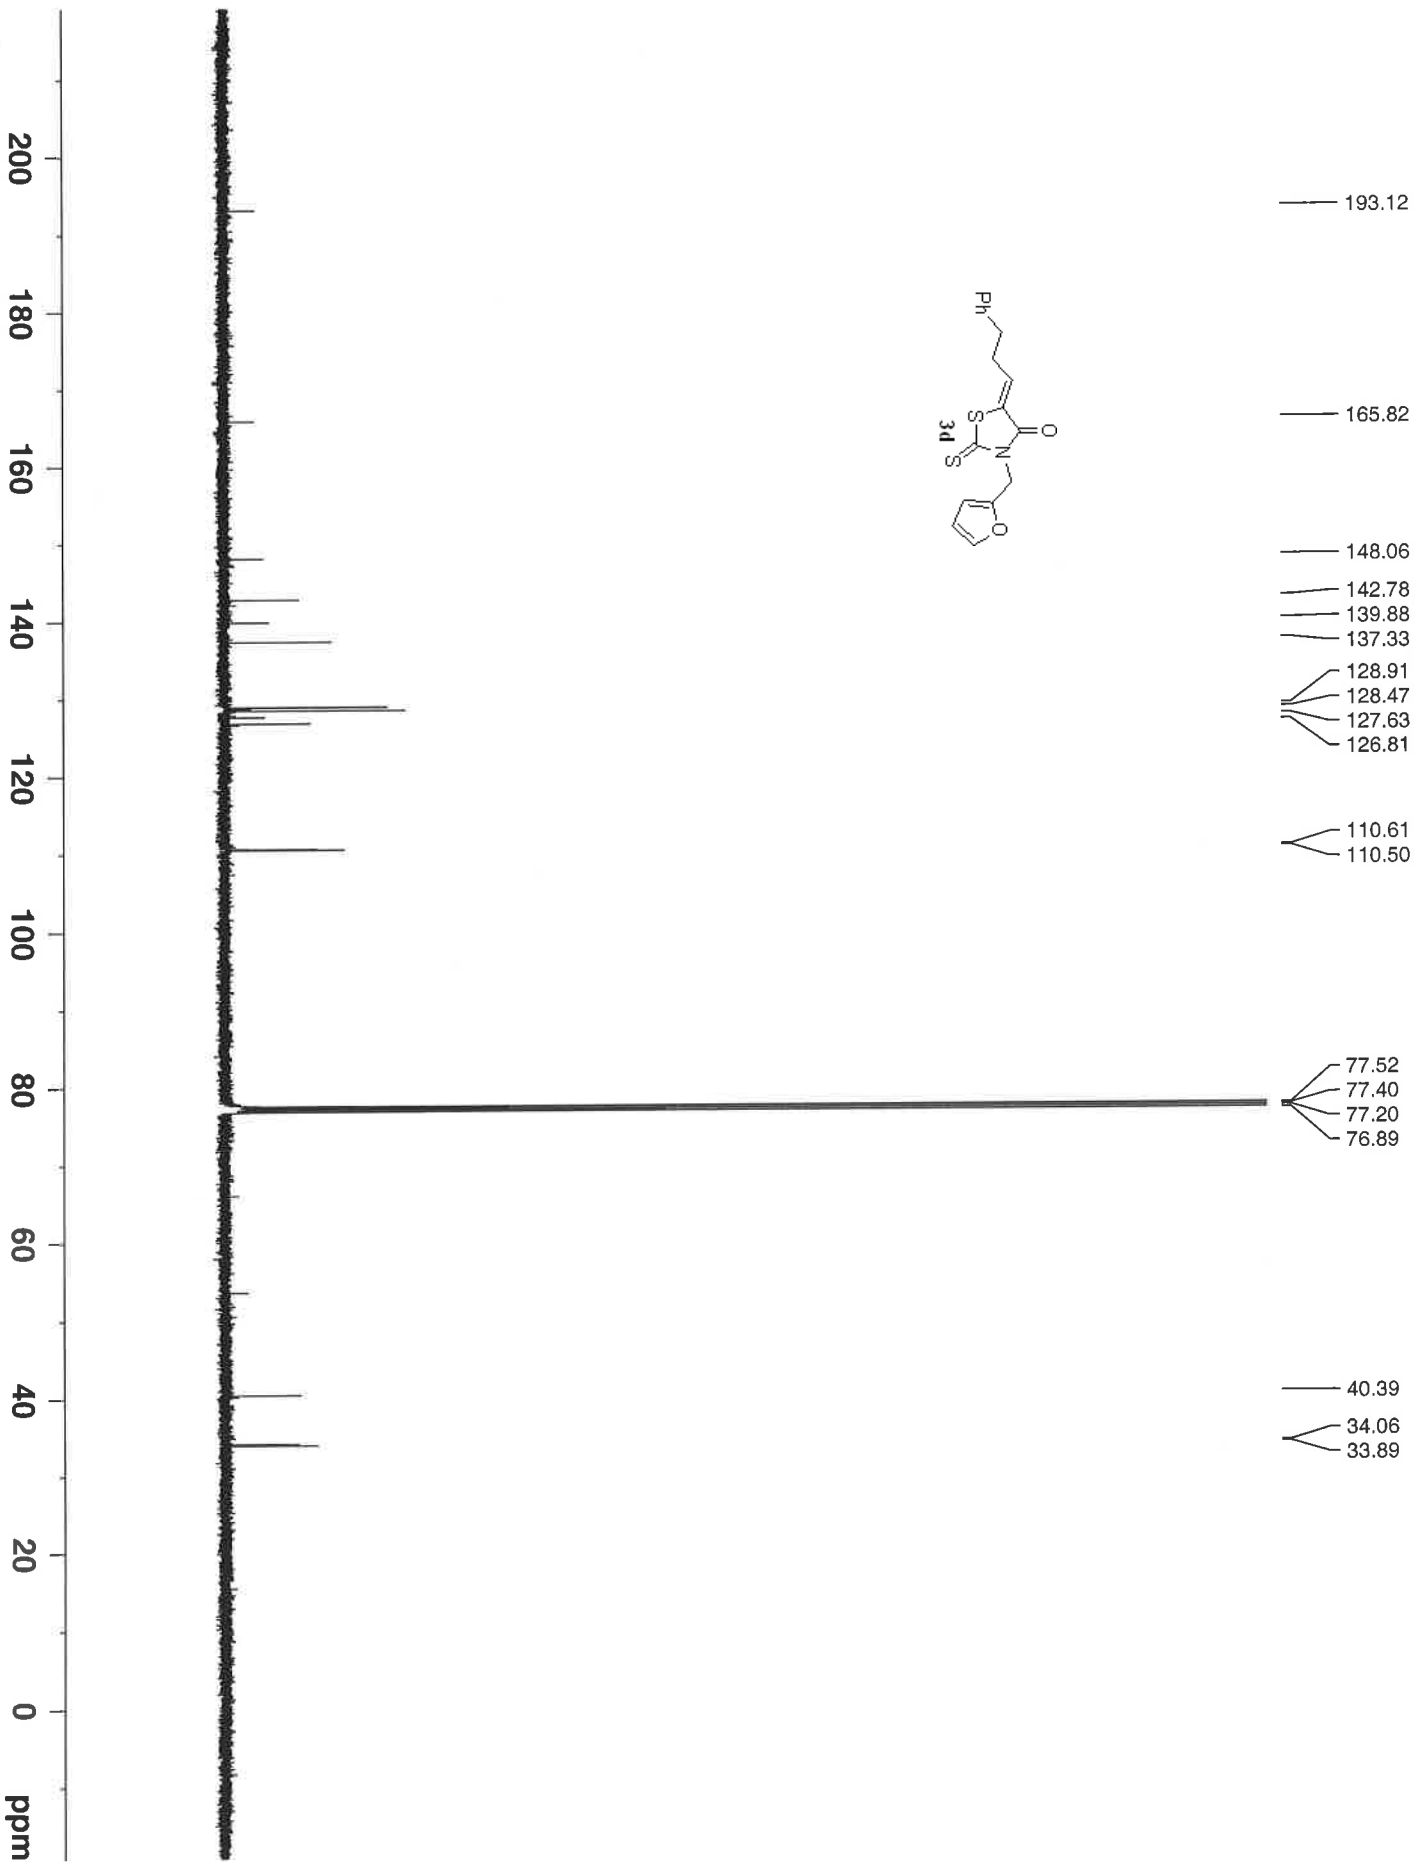

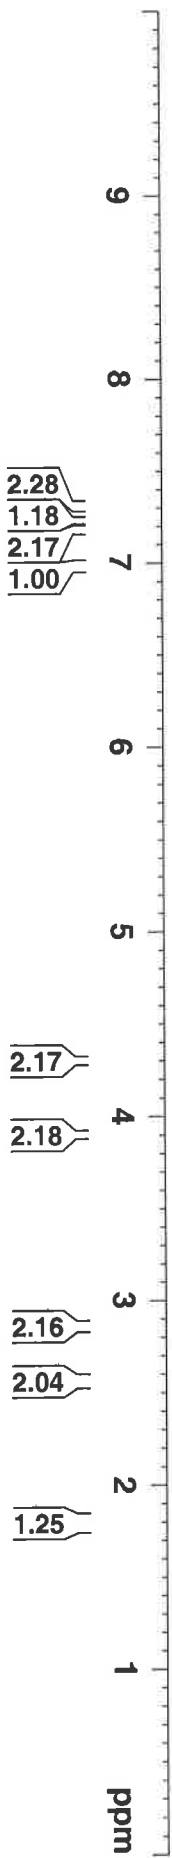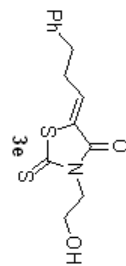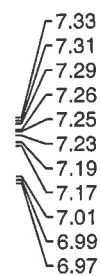

— 5.30

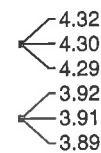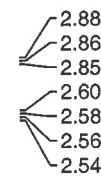

— 1.80

— 1.26

— 0.07

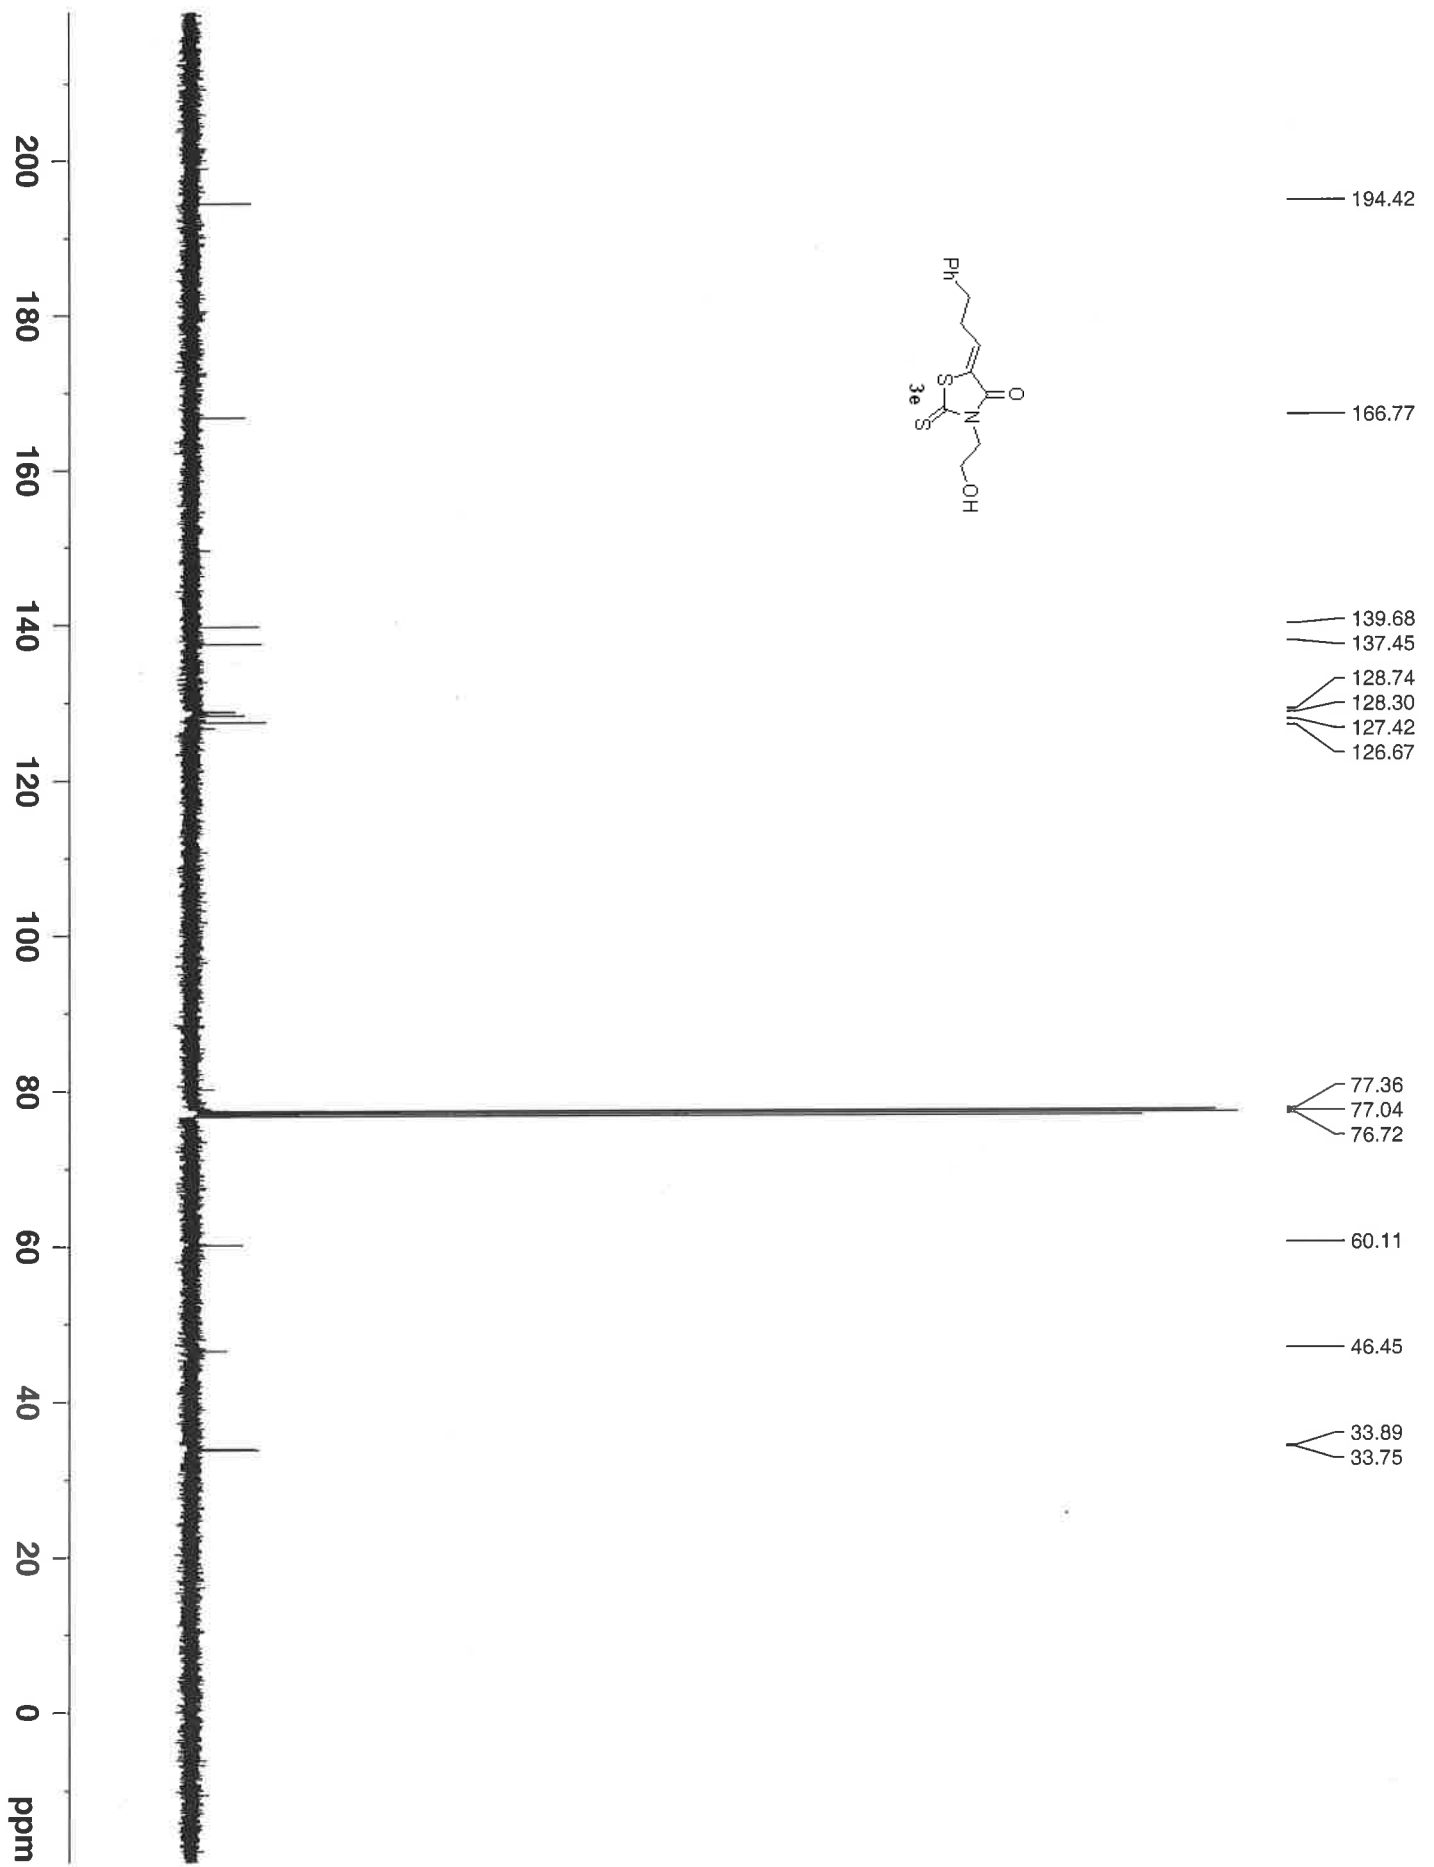

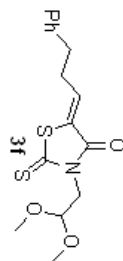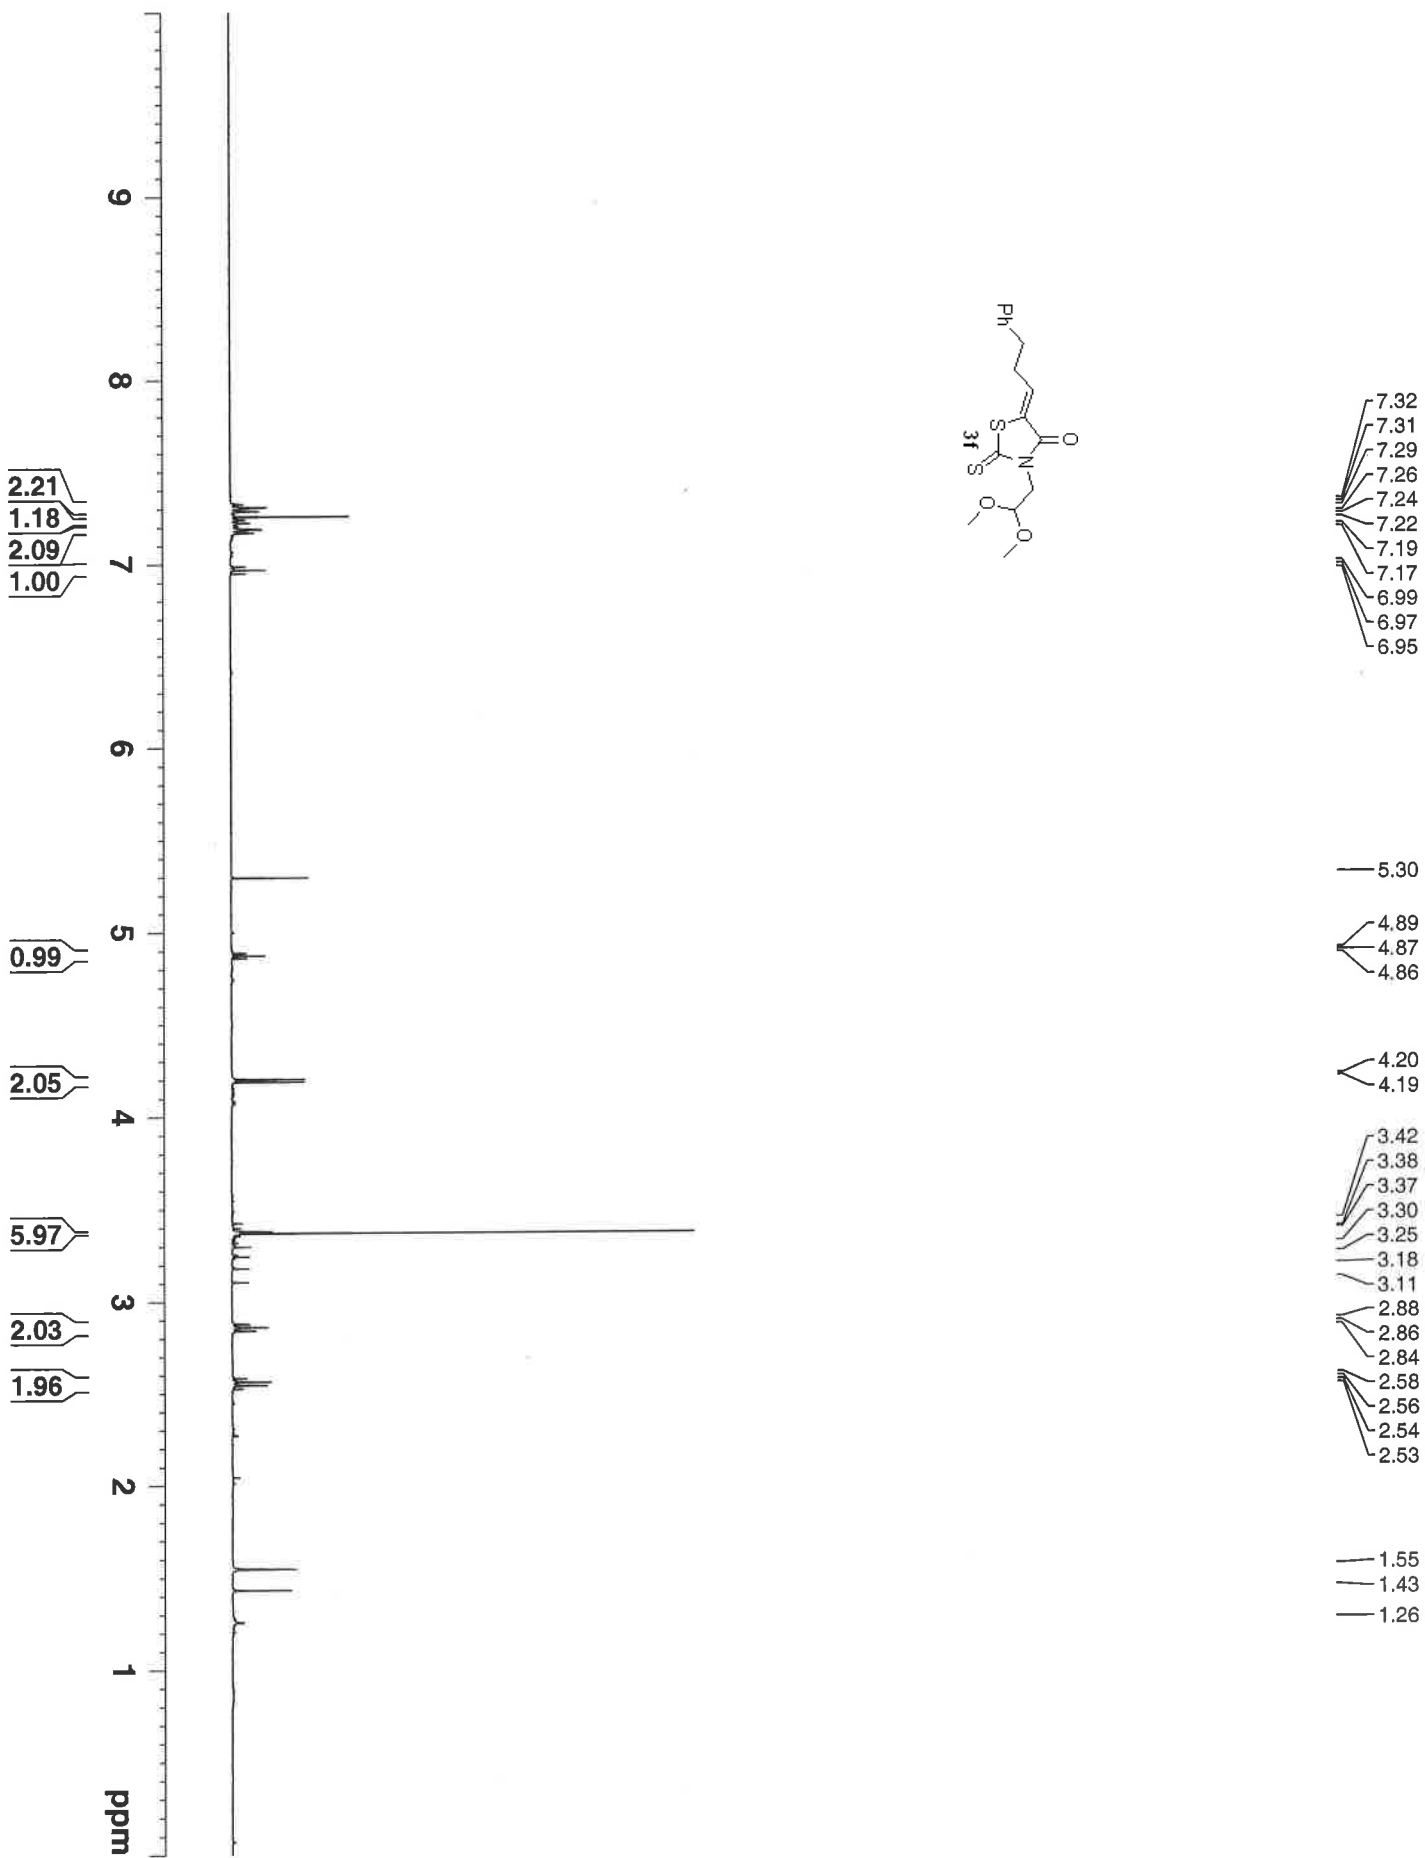



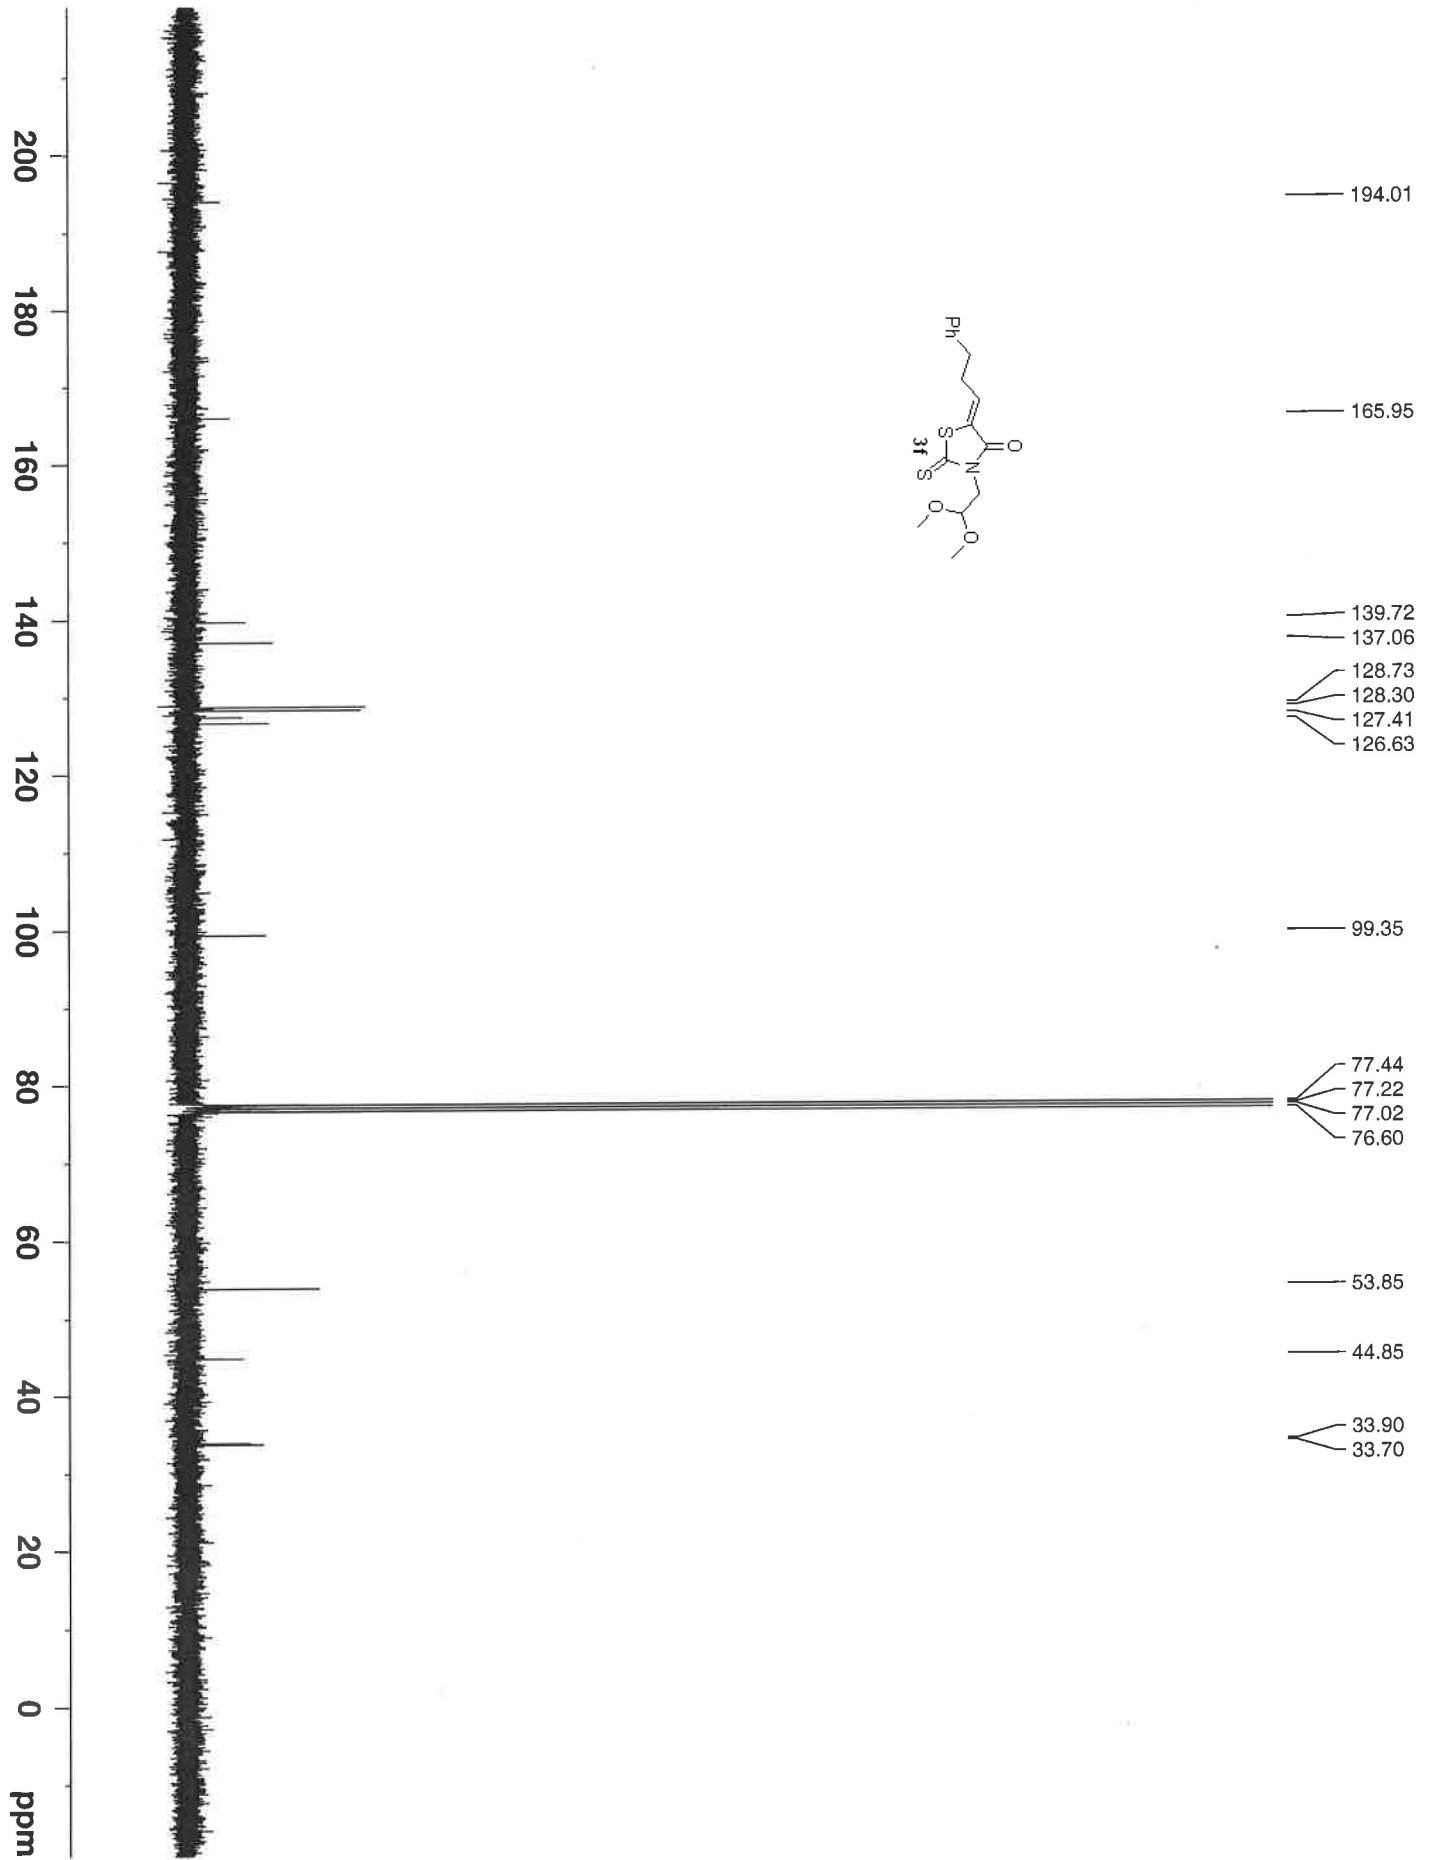

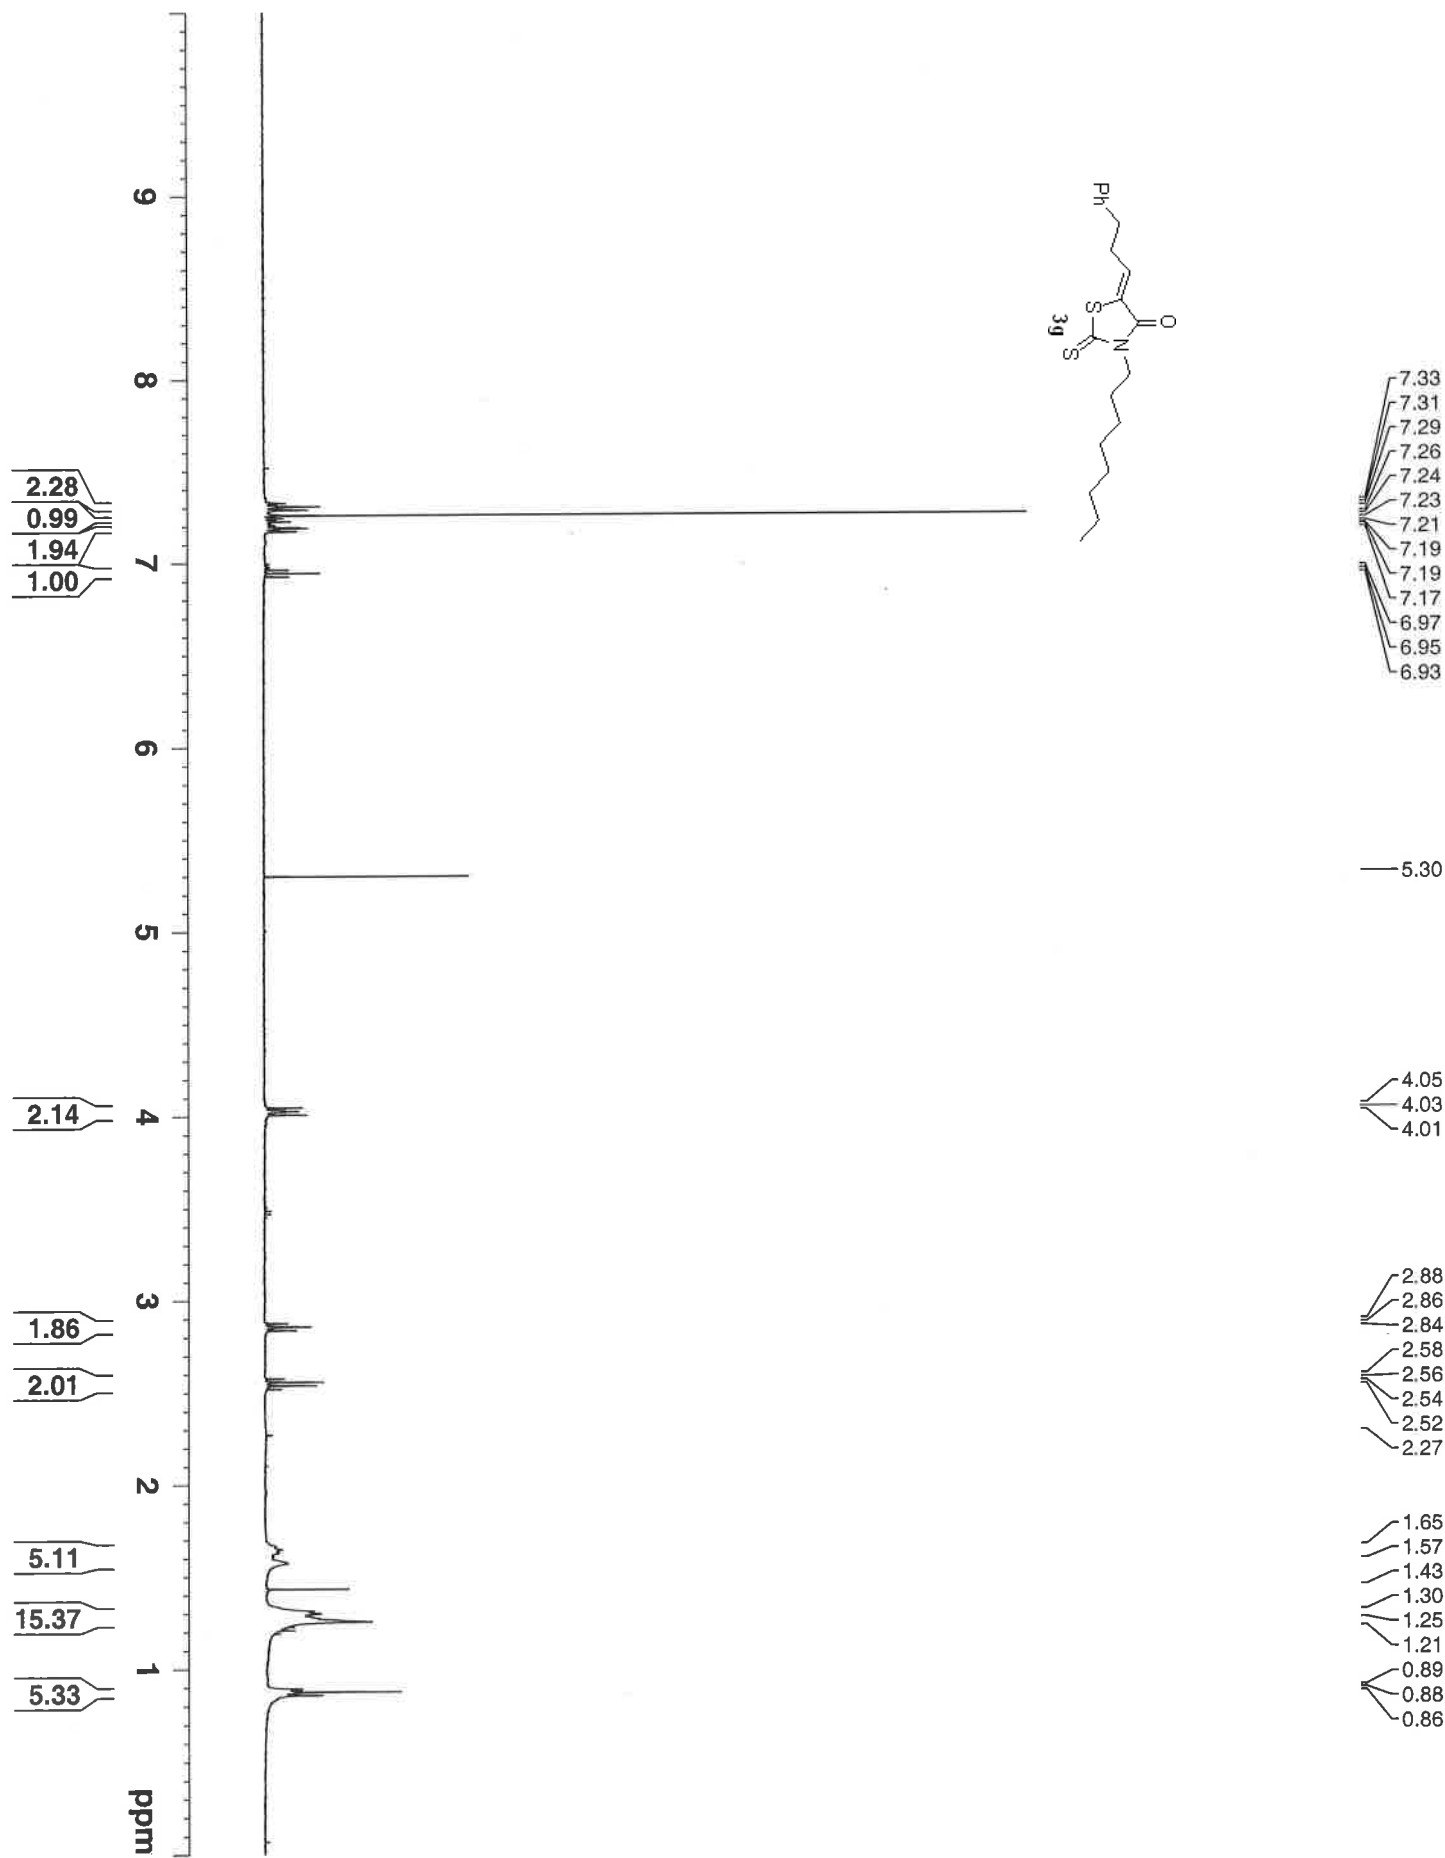

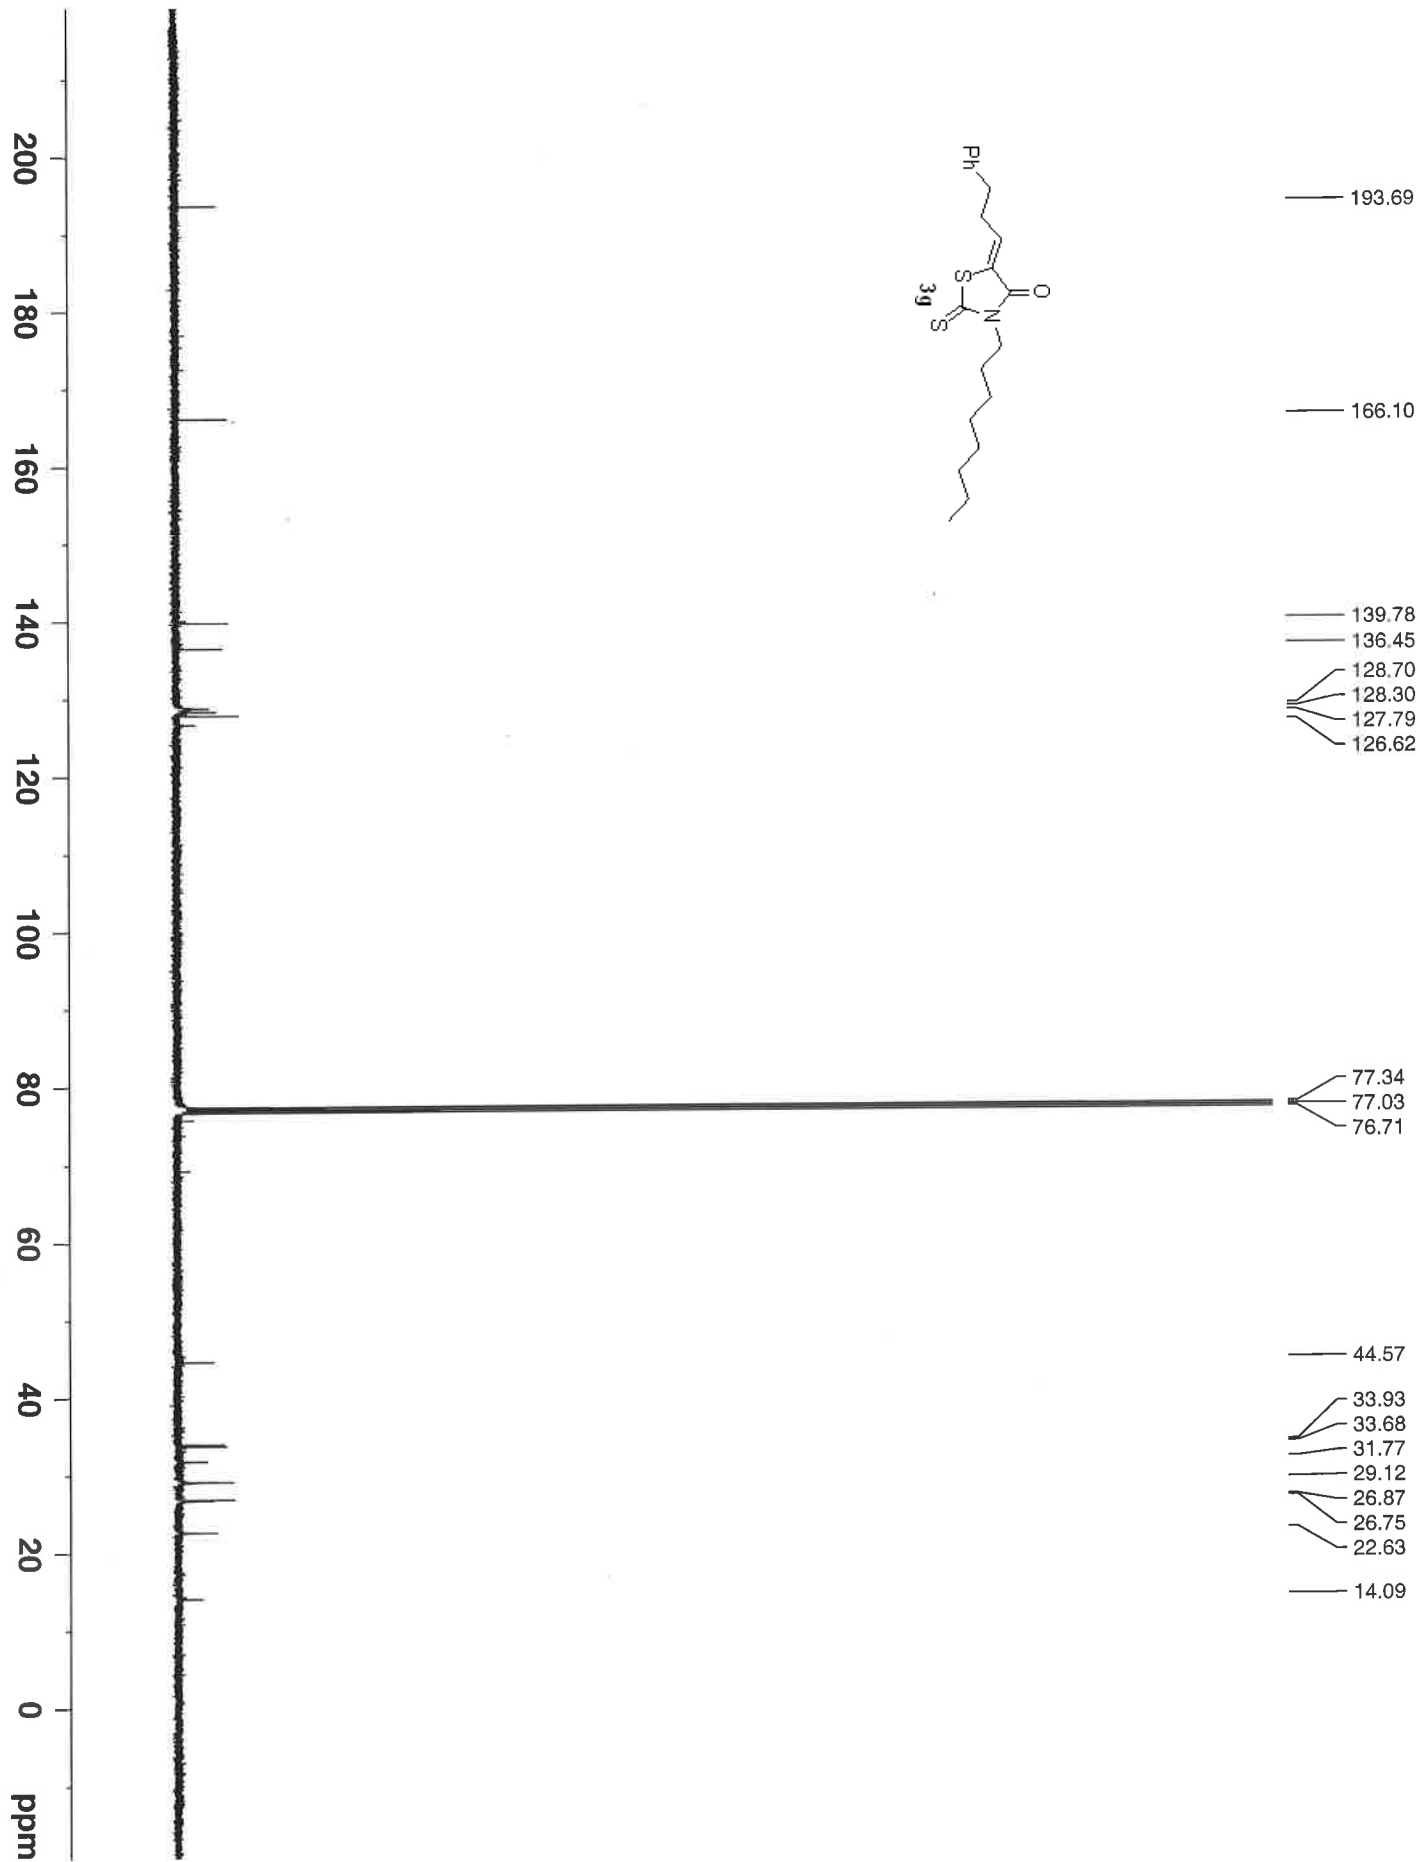

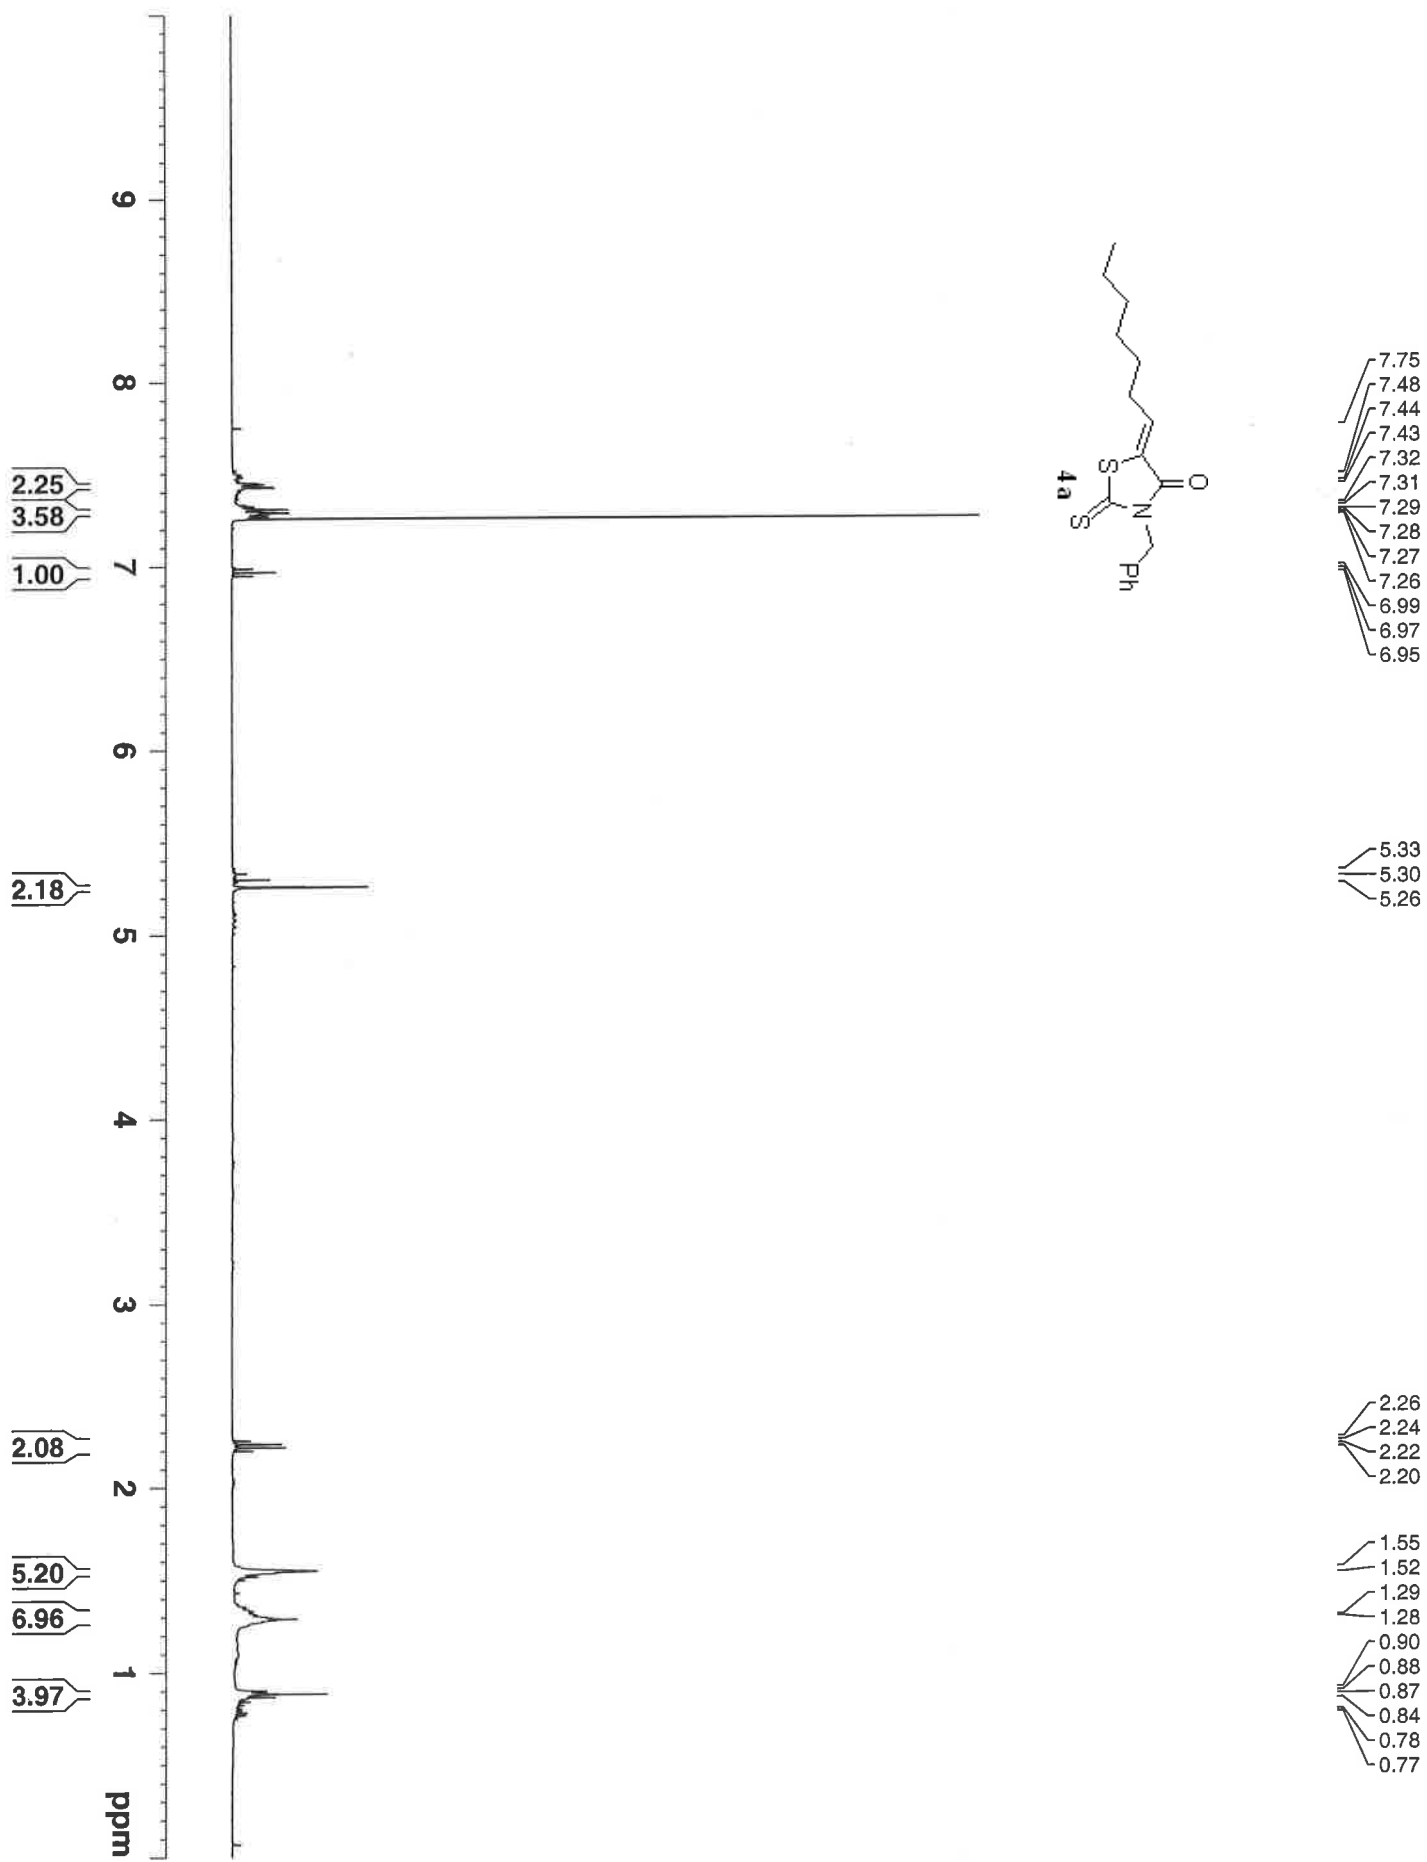

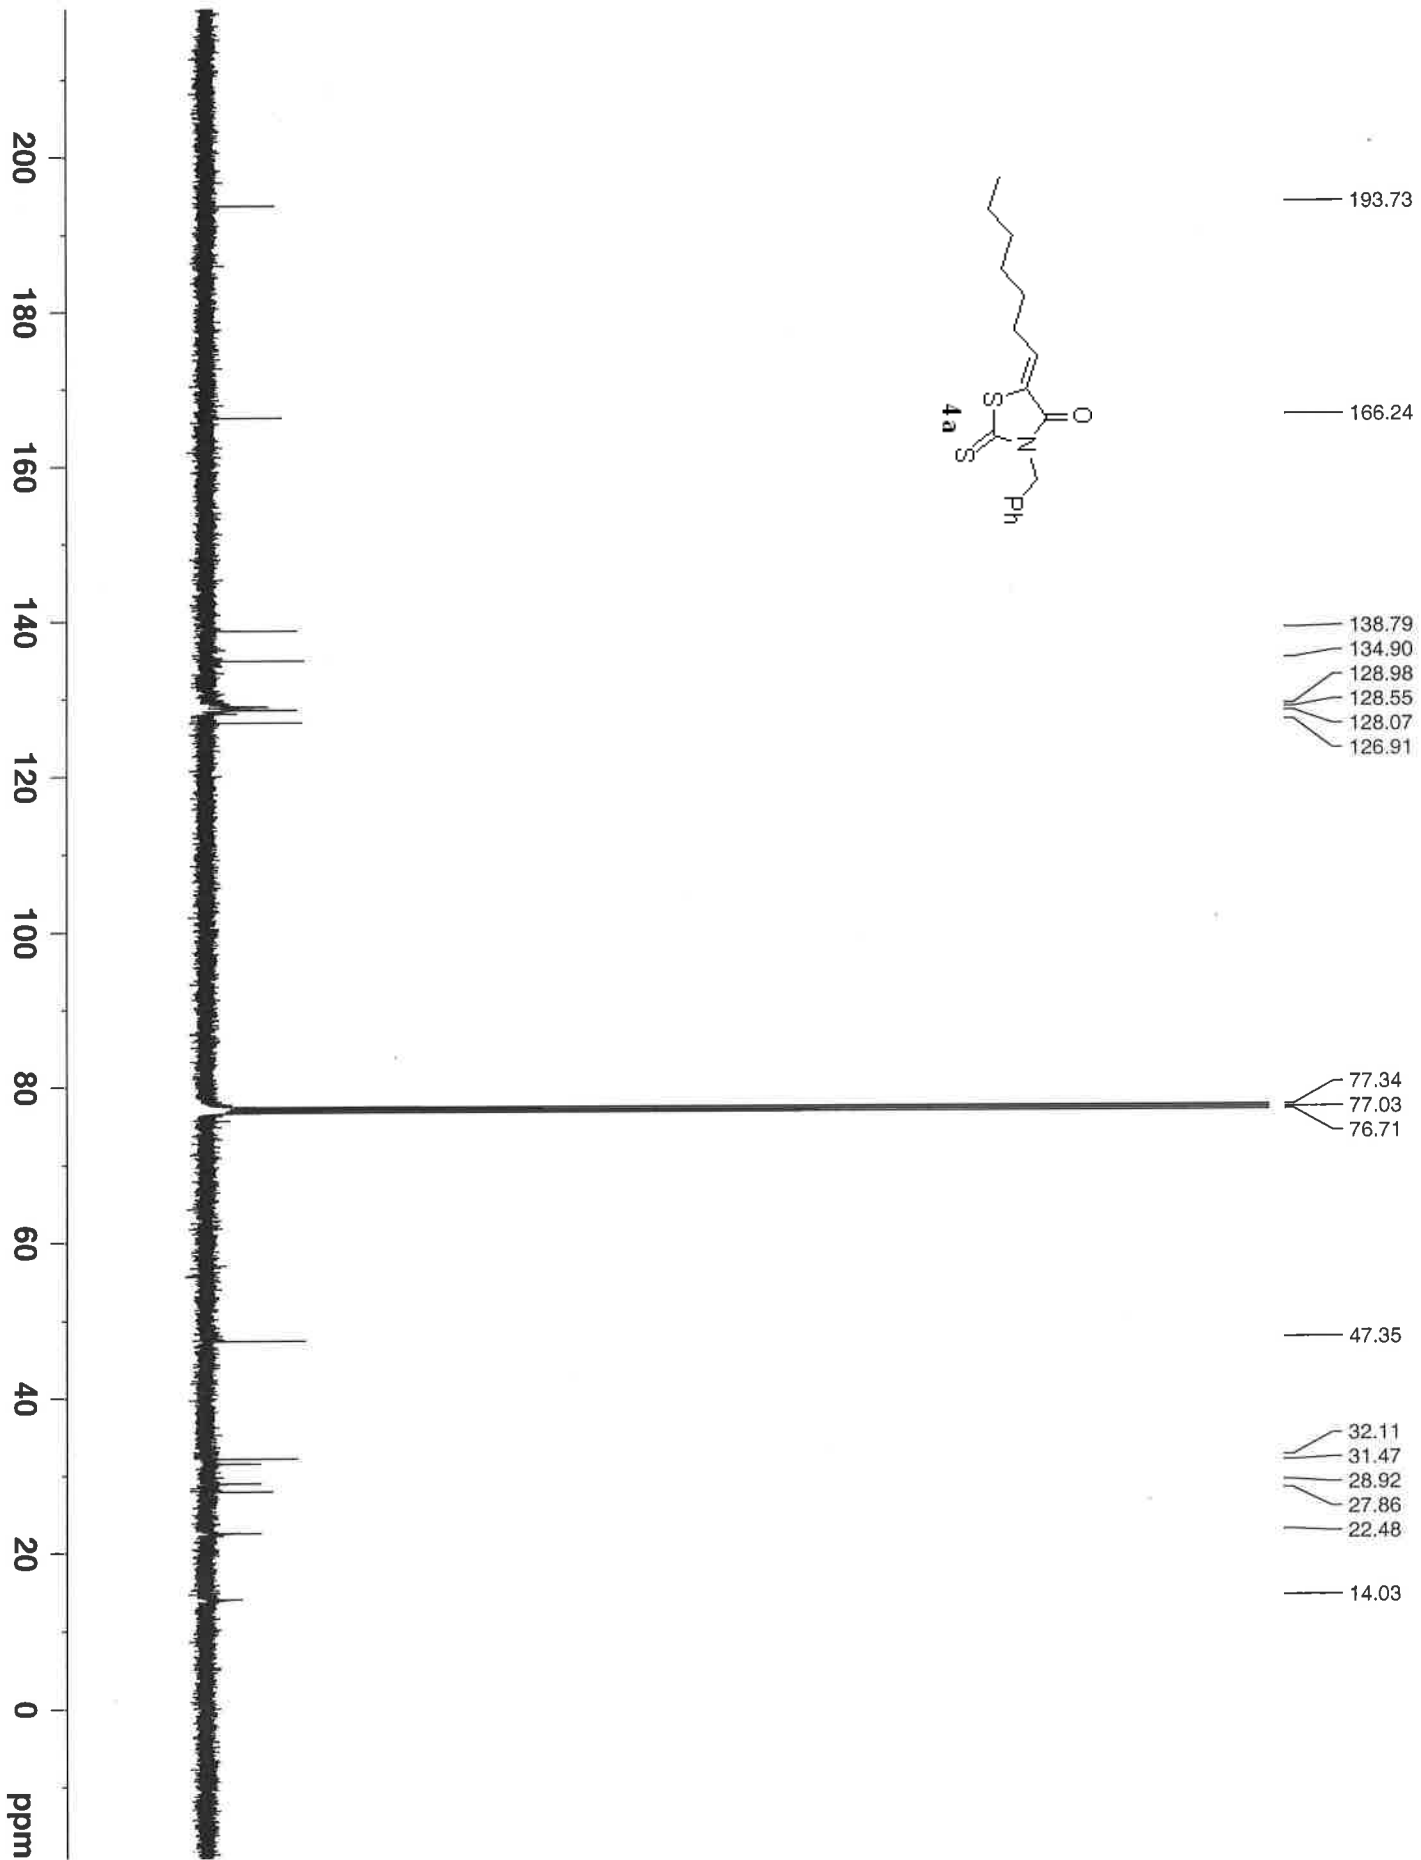

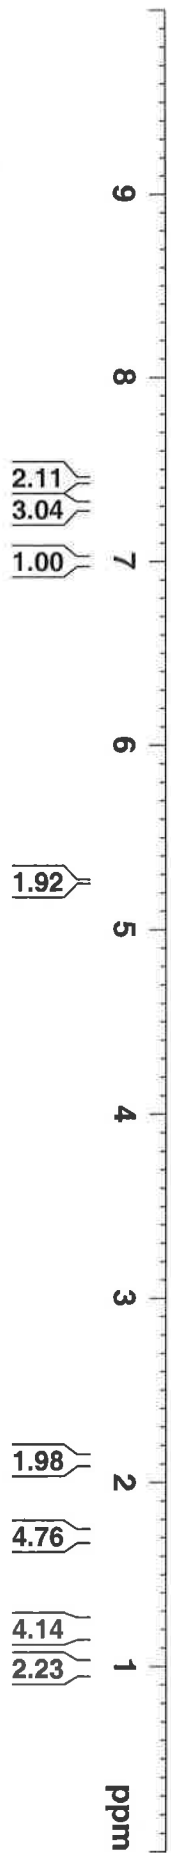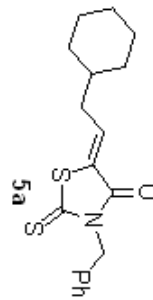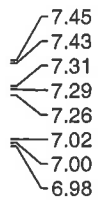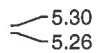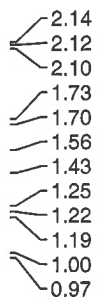

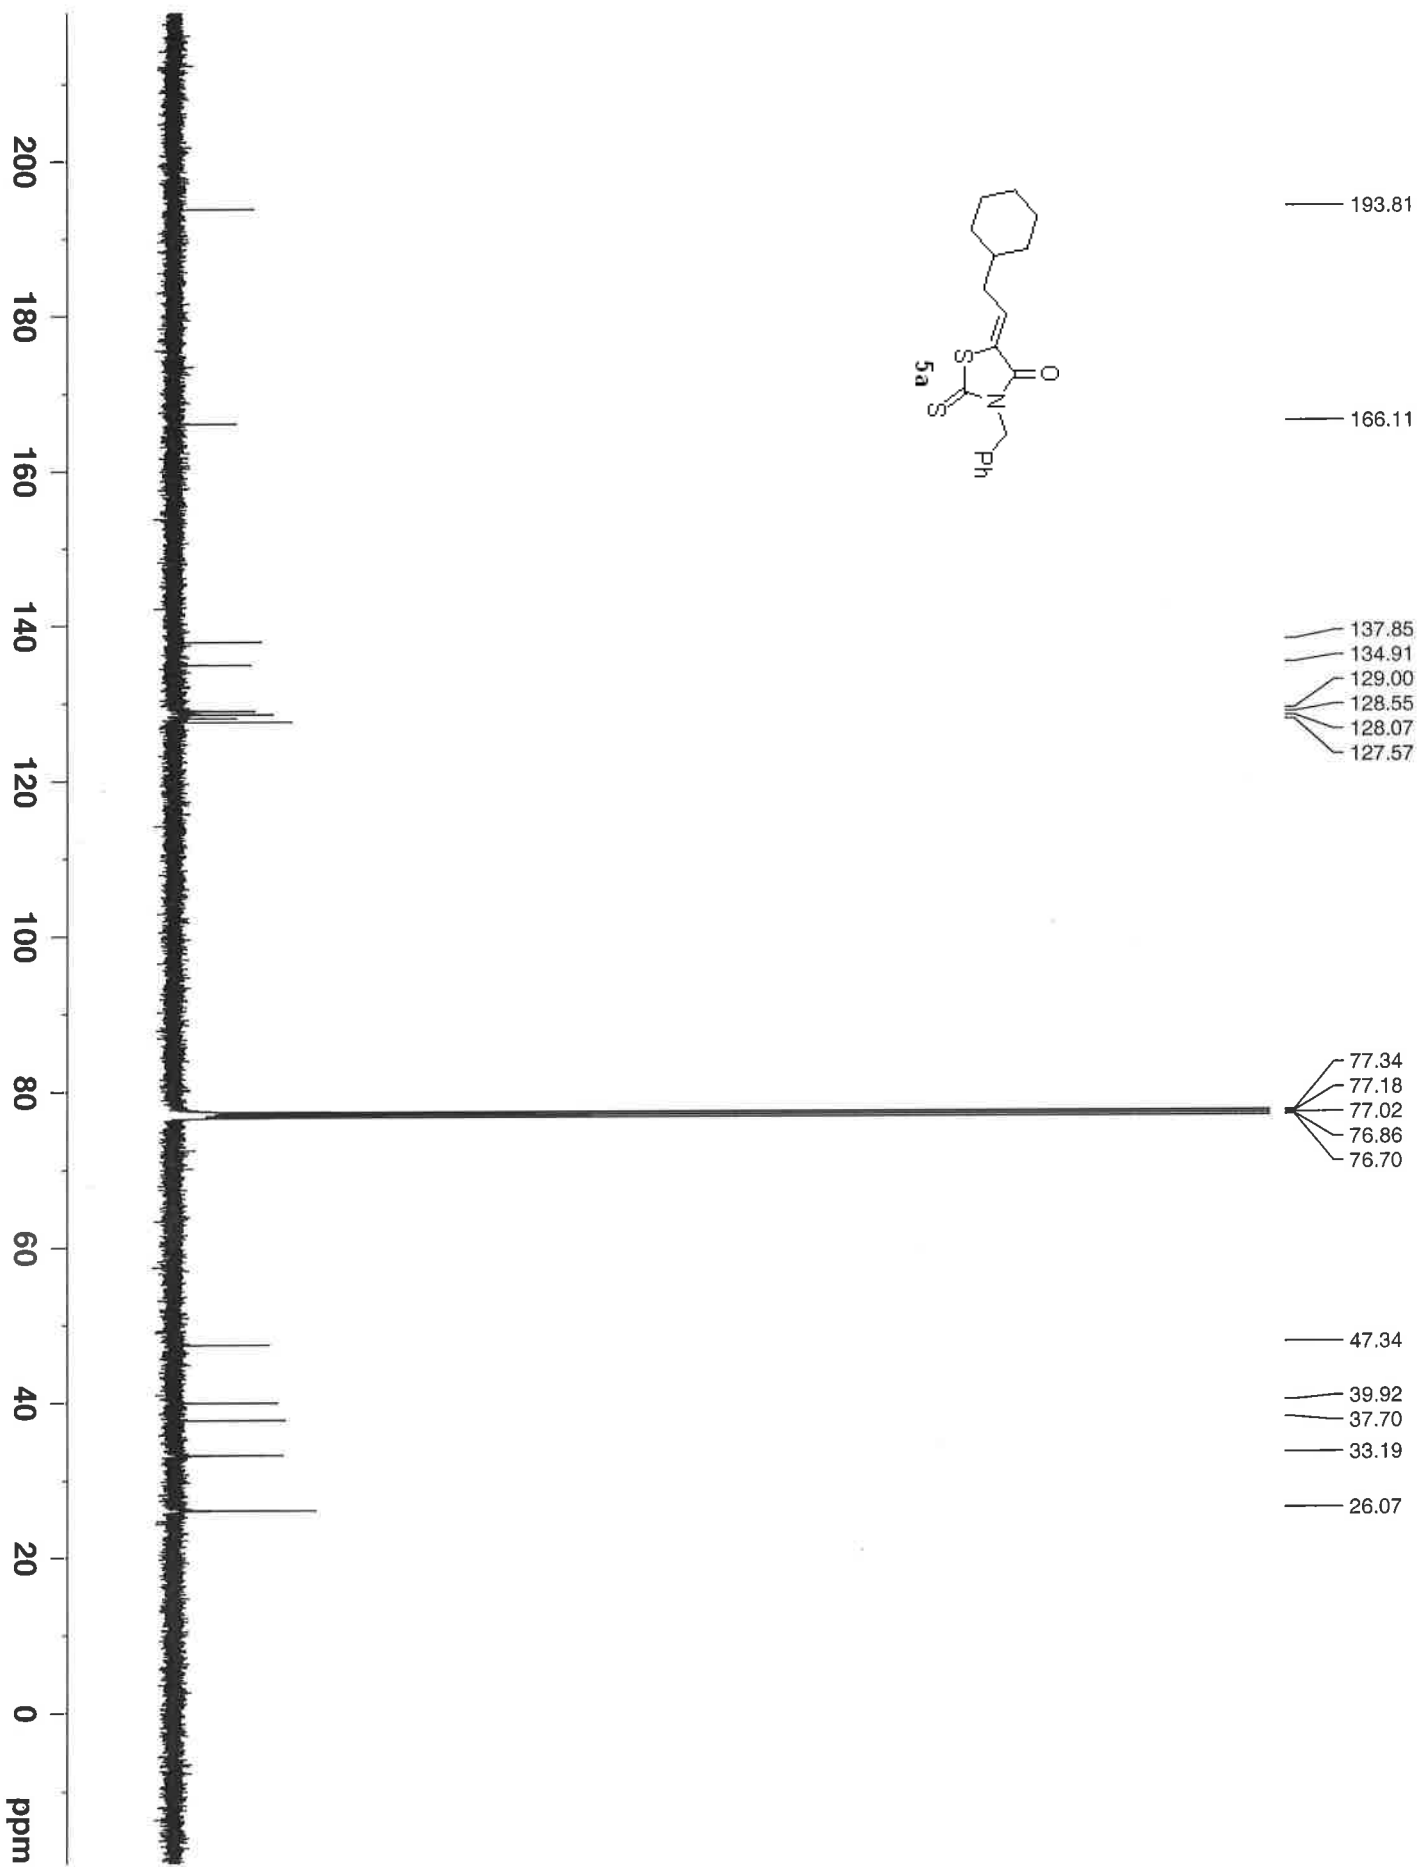

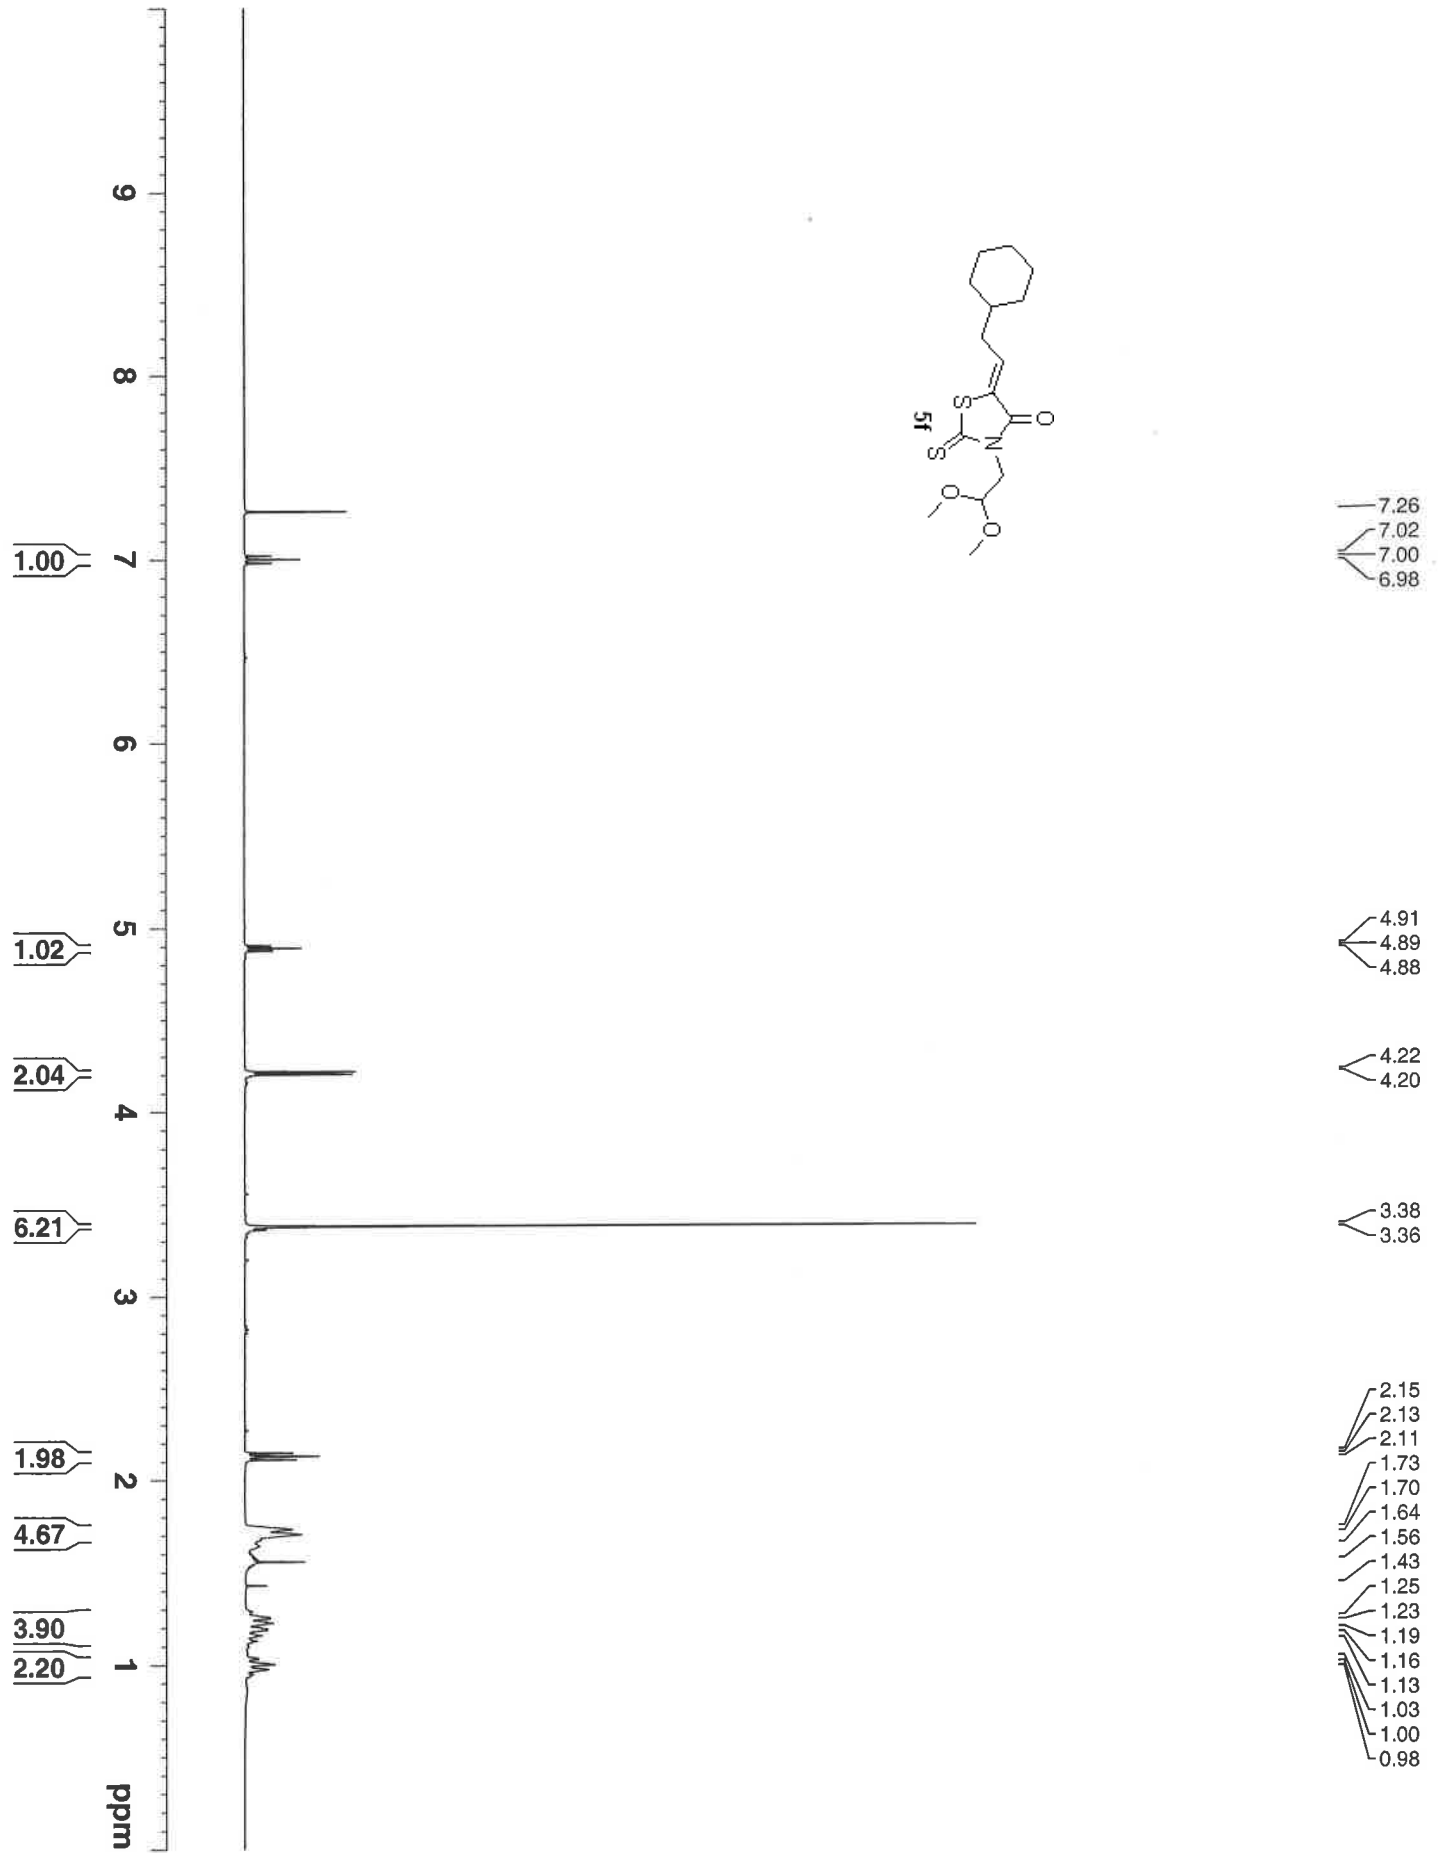



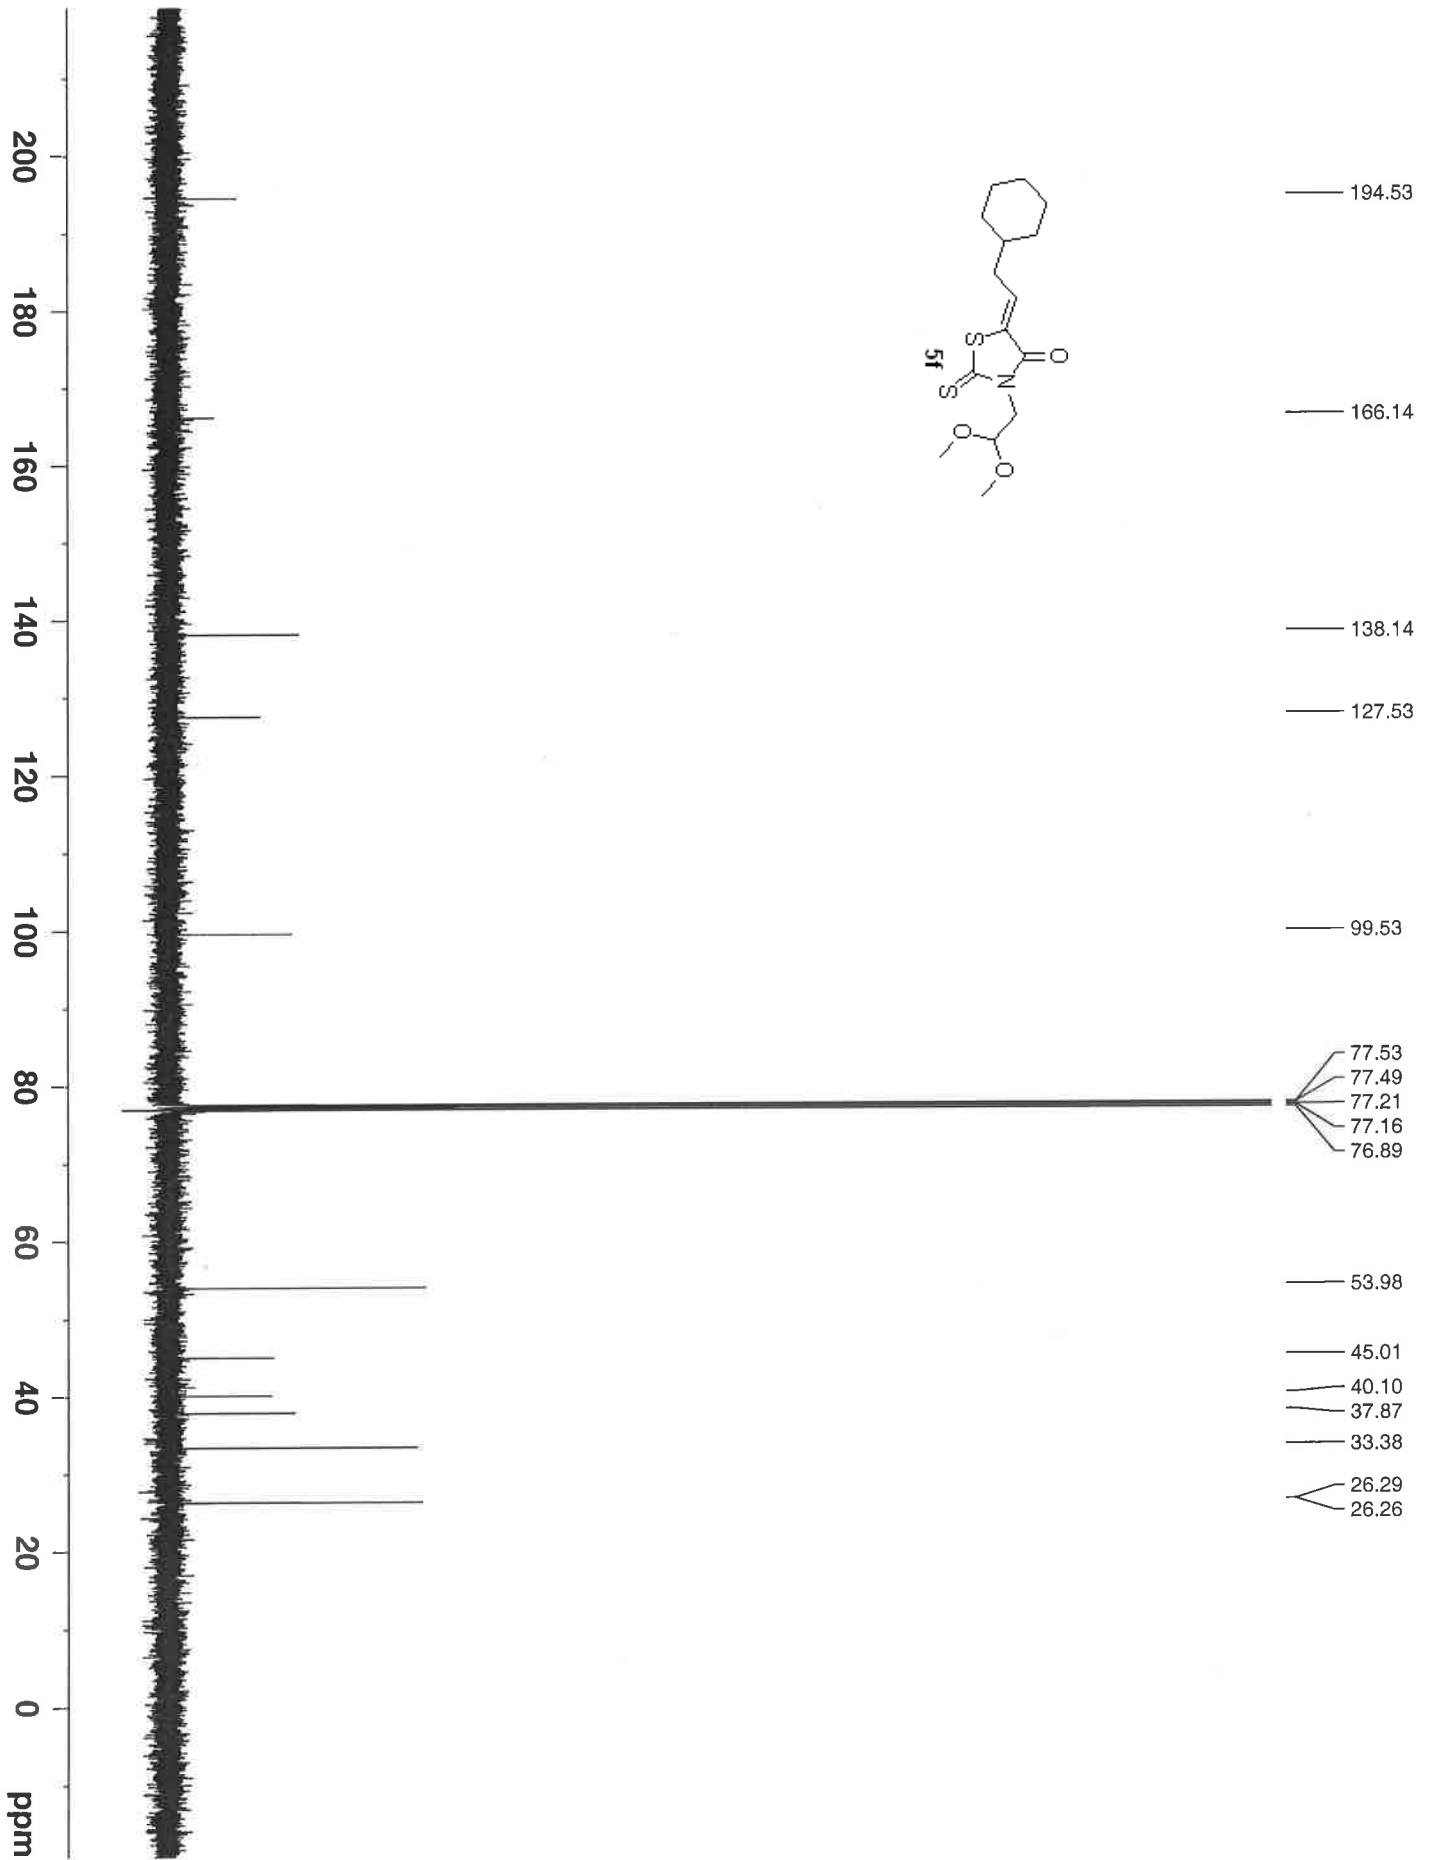

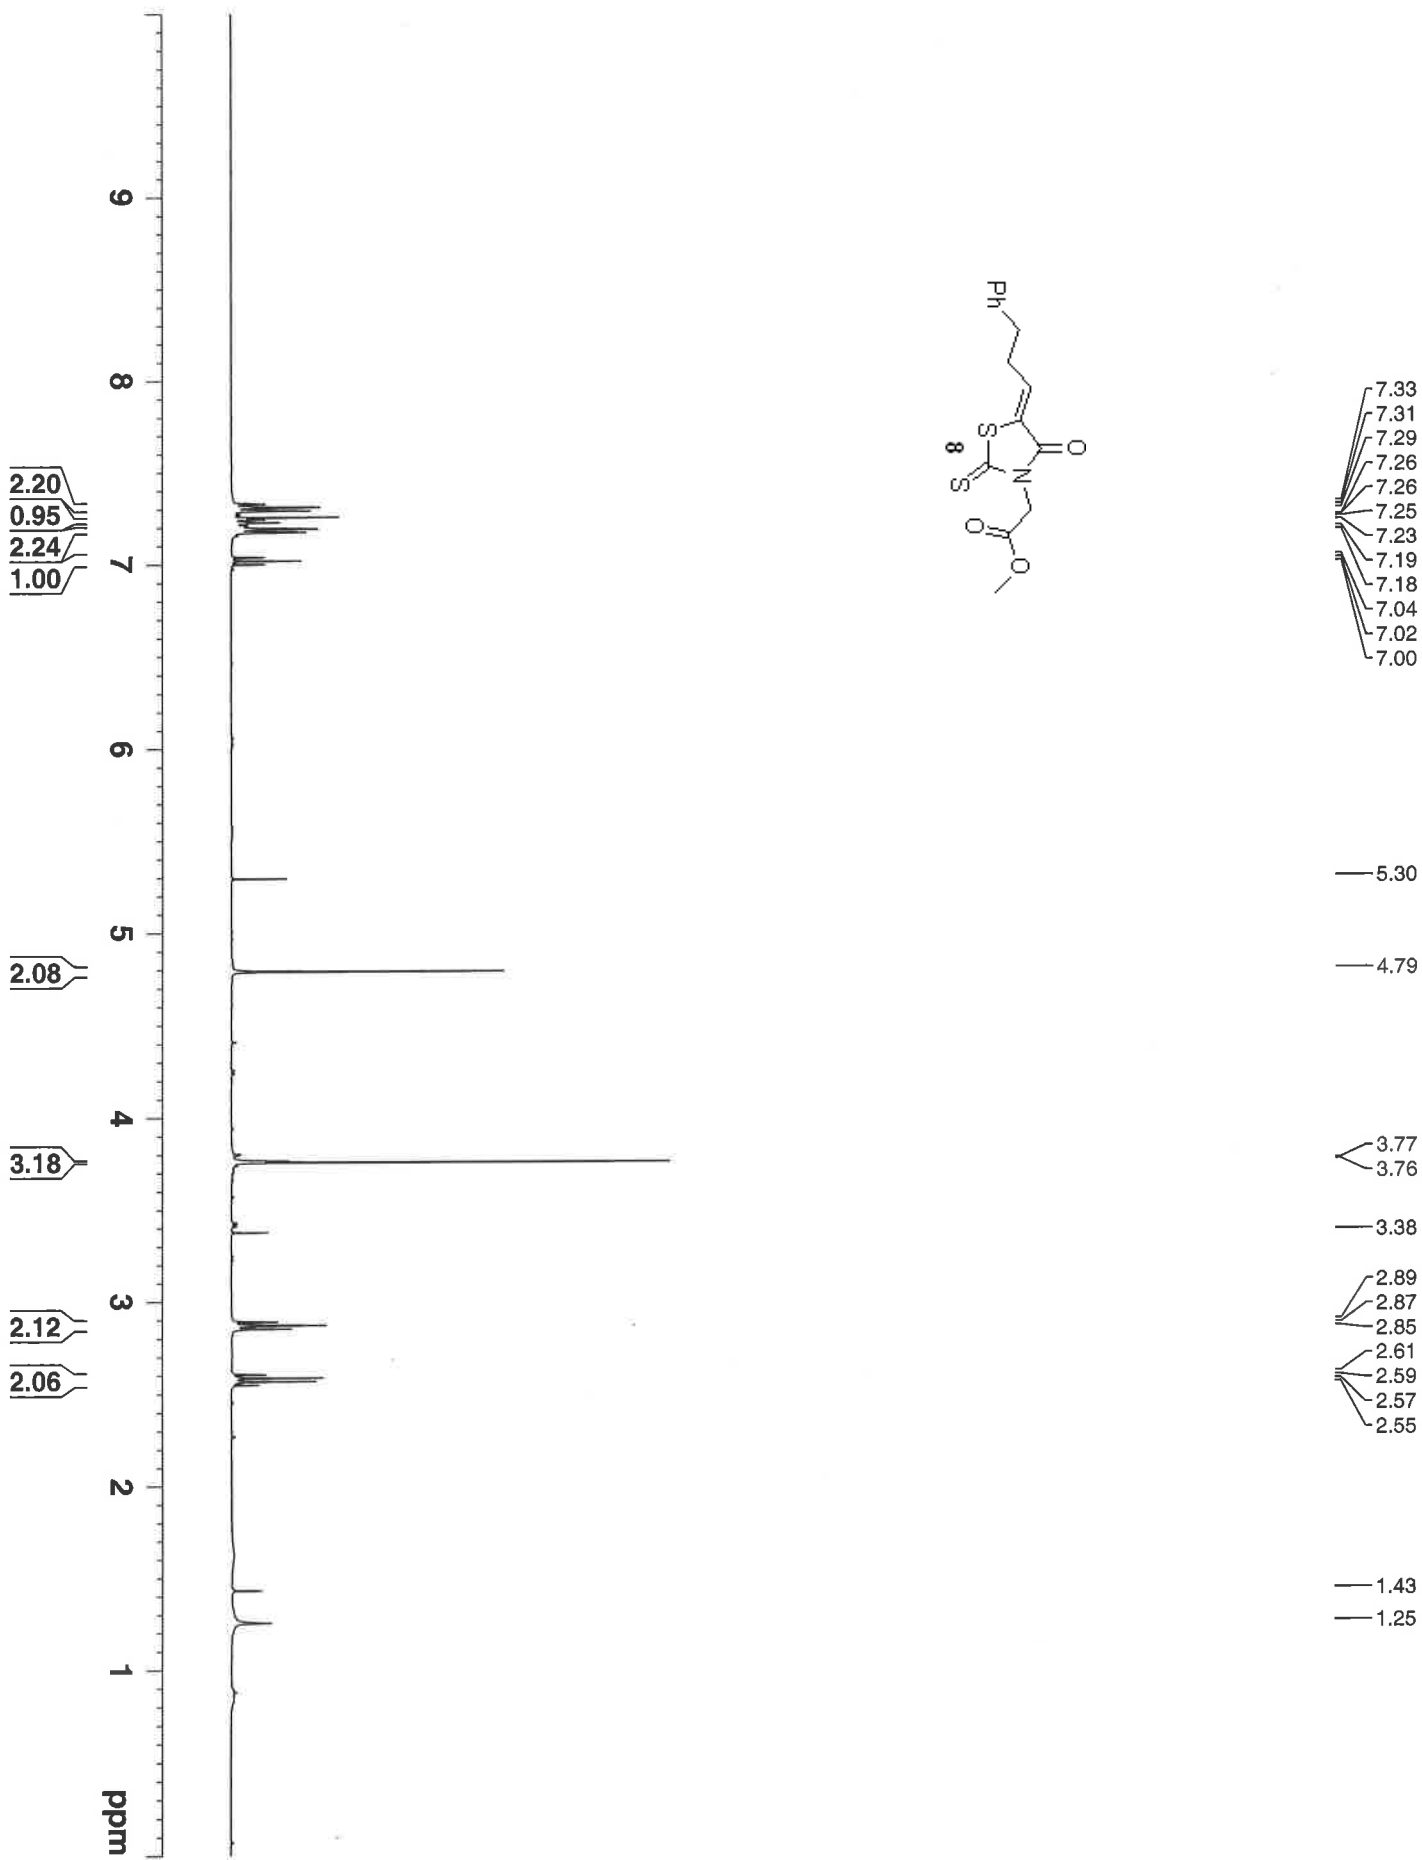

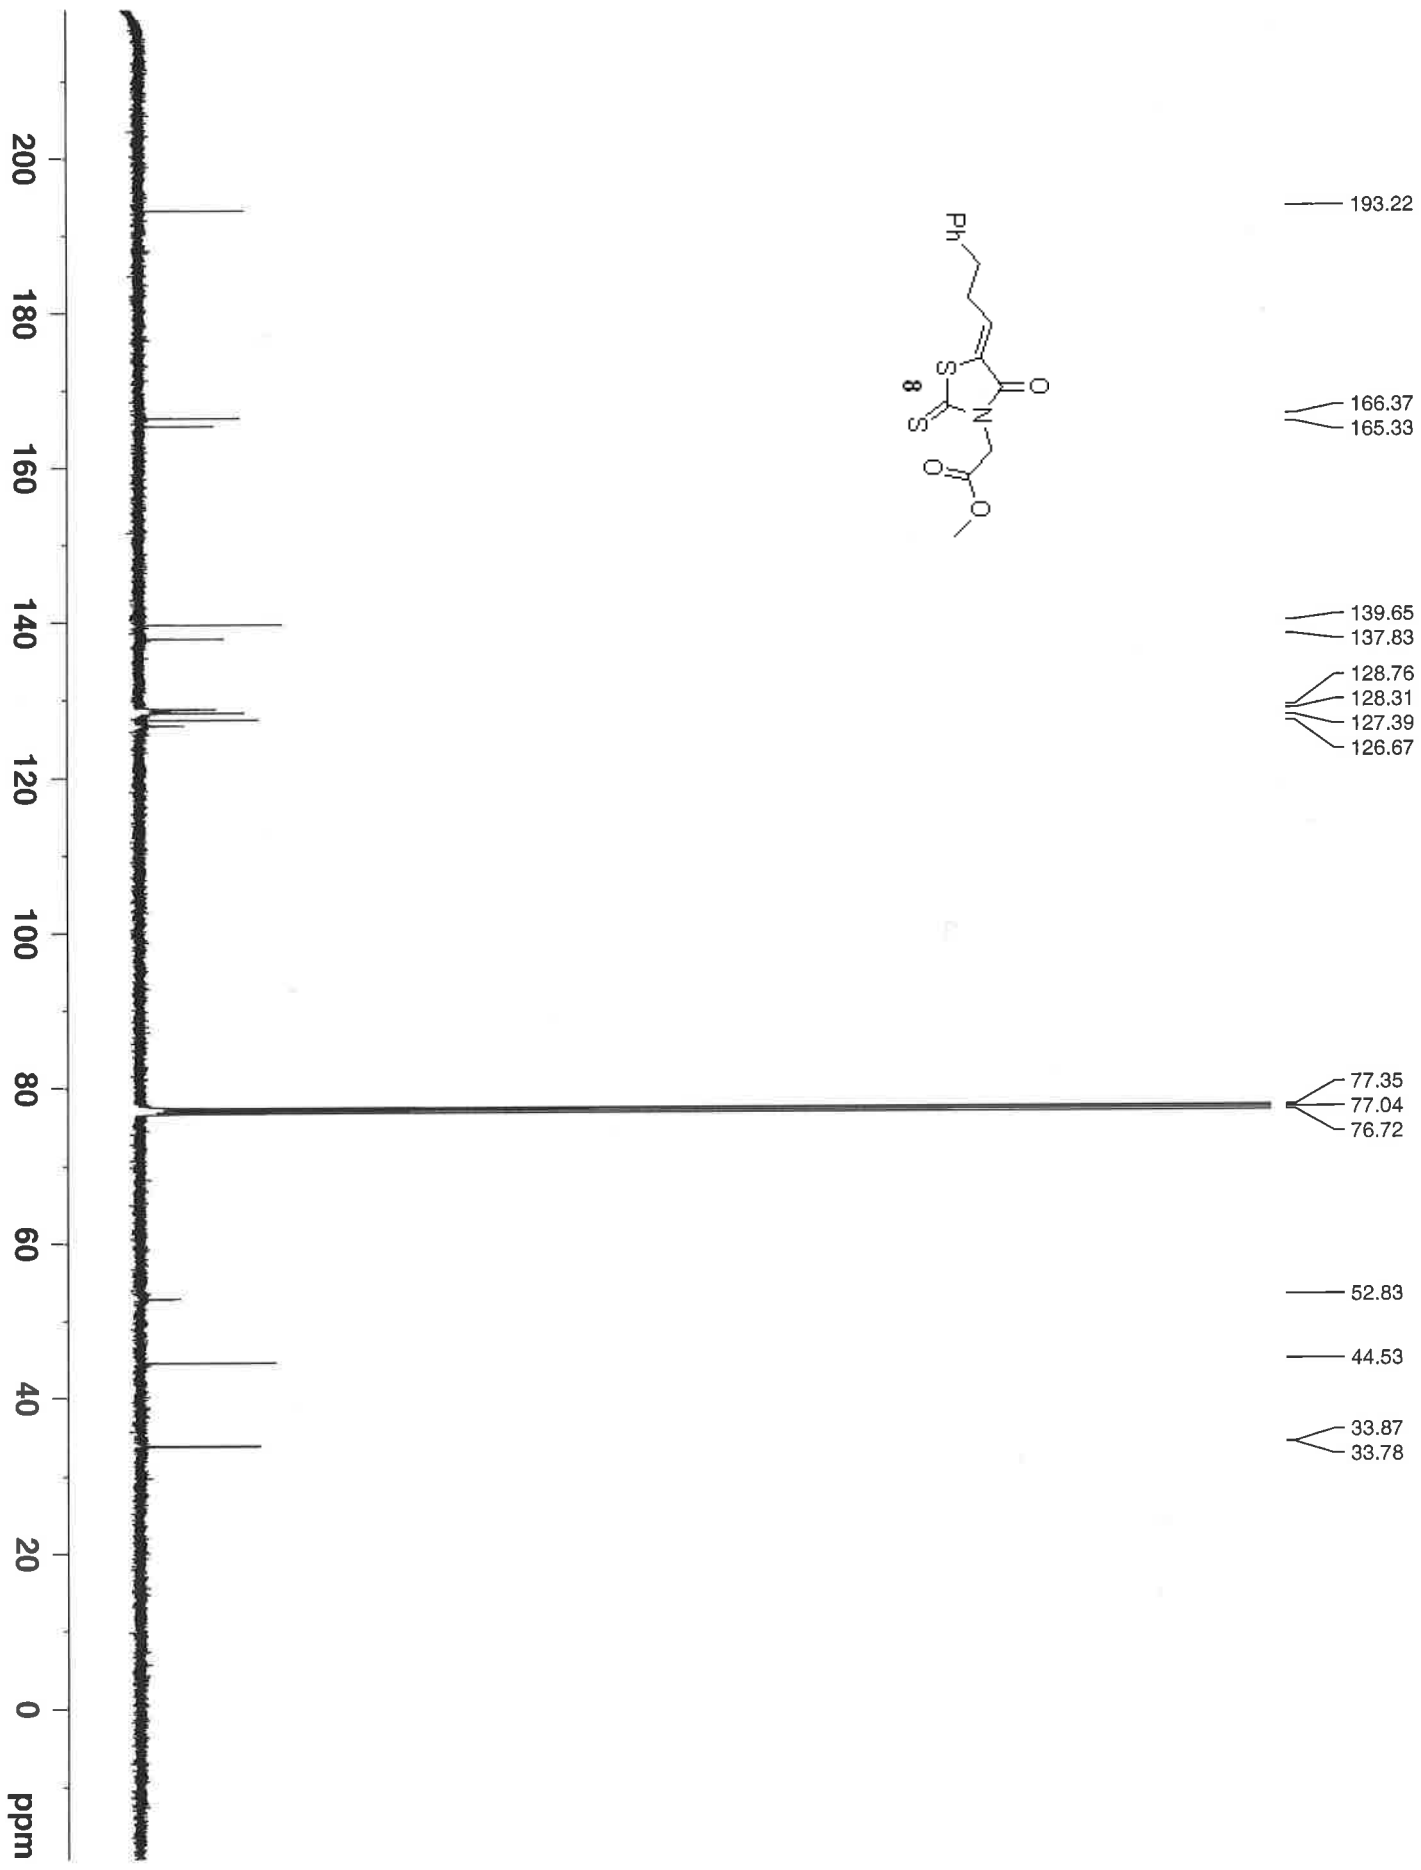

Supplement: NIHMS320422-supplement-1_si_001.pdf [file NIHMS320422-supplement-1_si_001.pdf]
